# Supplementary material for: Landscape of Metabolite-Protein Interaction Networks Reveals Prognostic Subtypes of Ovarian Cancer
Source: Research Square preprint supplement (doi:10.21203/rs.3.rs-3235226/v1), 2023-08-10
Supplement: Supplementary file 1 [file 02cec4390adf49e513dd2f81.xlsx]

## Sheet: Table S5
gene	p.value
LRP10	0.0176571
PTPRB	0.0129823
UNC13C	0.0336044
COL11A1	0.0185018
TCHHL1	0.0176571
CTNNA1	0.0176571
MYO16	0.0336044
ALG10B	0.0185018
MVP	0.00815237
ZNF44	0.0176571
EEF1G	0.0176571
FAM161A	0.00815237
ROBO3	0.00717493
DNER	0.0176571
ADAM23	0.0176571
SOWAHC	0.0176571
TRA2B	0.0176571
SYNM	0.0176571
TIE1	0.0176571
CGRRF1	0.0176571
EEF2K	0.0176571
CYBB	0.0176571
CCNH	0.0176571
NXPE3	0.0176571
KIR3DL3	0.00224586
CNTN3	0.0176571
GPR21	0.0176571
APLP2	0.0176571
C5orf55	0.0176571
RNF5	0.0176571
OR2J2	0.0176571
ZNF716	0.0176571
CR1L	0.0176571
STC1	0.0176571
ZNF227	0.0176571
IK	0.0176571
SLC35B2	0.0176571
YWHAG	0.0176571
SLC4A11	0.0176571
TNFRSF10A	0.0176571
NIT2	0.0176571
PROSER1	0.0176571
ANGEL1	0.0176571
WAPAL	0.0176571
FPGS	0.0176571
