# Supplementary material for: Landscape of Metabolite-Protein Interaction Networks Reveals Prognostic Subtypes of Ovarian Cancer
Source: Research Square preprint supplement (doi:10.21203/rs.3.rs-3235226/v1), 2023-08-10
Supplement: Supplementary file 2 [file 19f5db67e5ab32639ed8ab09.xlsx]

## Sheet: Table S2
baseMean	log2FoldChange	lfcSE	stat	pvalue	padj
OVGP1	3642.59	-4.65275	0.252492	-18.4273	7.9273e-76	1.30547e-71
PIGR	1744.74	-3.48989	0.27164	-12.8475	8.88785e-38	2.43942e-34
CDHR4	194.927	-3.02299	0.261889	-11.5431	8.00358e-31	3.13817e-28
SNTN	99.3125	-2.78403	0.234254	-11.8847	1.42177e-32	8.83983e-30
TUBA4B	155.63	-2.766	0.240624	-11.4951	1.39569e-30	4.99656e-28
MAP3K19	74.0896	-2.71071	0.238152	-11.3823	5.12549e-30	1.68813e-27
AKAP14	62.1451	-2.69472	0.22365	-12.0488	1.96755e-33	1.4728e-30
ERICH3	89.139	-2.48309	0.239185	-10.3814	3.0118e-25	4.27572e-23
CDC20B	579.587	-2.45975	0.297895	-8.2571	1.49252e-16	6.53692e-15
C1orf194	409.38	-2.32494	0.212857	-10.9225	8.995e-28	2.00175e-25
ANKUB1	16.028	-2.30884	0.217766	-10.6024	2.9039e-26	4.93004e-24
FAM183A	296.356	-2.24904	0.193596	-11.6171	3.37229e-31	1.38837e-28
C9orf24	477.337	-2.20018	0.218709	-10.0599	8.31249e-24	9.57273e-22
C1orf189	23.8648	-2.18848	0.212427	-10.3023	6.88219e-25	9.21431e-23
TCTE1	54.2744	-2.16957	0.211137	-10.2757	9.07094e-25	1.19504e-22
C11orf16	53.5359	-2.16184	0.220759	-9.79274	1.20969e-22	1.17877e-20
SPDEF	2071	-2.14264	0.186072	-11.5151	1.10761e-30	4.14549e-28
C9orf135	89.7109	-2.13199	0.192274	-11.0883	1.42949e-28	3.46188e-26
NTS	557.569	-2.12034	0.272678	-7.77597	7.48723e-15	2.59578e-13
VWA3B	160.922	-2.11324	0.186557	-11.3276	9.58191e-30	2.76833e-27
HMGCS2	208.556	-2.10693	0.298358	-7.06176	1.64401e-12	4.11453e-11
TEKT1	221.935	-2.09668	0.230358	-9.10184	8.88175e-20	5.87409e-18
IL5RA	109.511	-2.08573	0.219803	-9.48906	2.33122e-21	1.93892e-19
DNAH12	118.961	-2.08274	0.192134	-10.84	2.22361e-27	4.81822e-25
MS4A8	151.527	-2.07429	0.290188	-7.14811	8.79784e-13	2.29608e-11
WDR38	284.243	-2.05876	0.206157	-9.98638	1.74851e-23	1.93251e-21
ROPN1L	314.342	-2.03562	0.185246	-10.9887	4.32996e-28	1.00431e-25
DTHD1	48.0564	-2.02273	0.230869	-8.76136	1.92905e-18	1.06246e-16
C10orf99	203.237	-2.0058	0.260485	-7.70023	1.35816e-14	4.59265e-13
FAM166B	356.8	-2.00125	0.185867	-10.7671	4.92227e-27	9.64998e-25
SRD5A2	67.8015	-1.9763	0.248316	-7.95881	1.73701e-15	6.60625e-14
TEKT4	63.2118	-1.96395	0.219685	-8.93984	3.89722e-19	2.3338e-17
LRRC74B	29.2978	-1.94831	0.227504	-8.56382	1.09188e-17	5.51568e-16
GAS2L2	70.5333	-1.94419	0.208001	-9.34701	9.01642e-21	6.7492e-19
C1orf158	134.7	-1.93097	0.24456	-7.89571	2.88661e-15	1.05403e-13
SCGB3A1	507.076	-1.92816	0.238265	-8.09251	5.84478e-16	2.38247e-14
AZGP1	338.606	-1.92148	0.220188	-8.72655	2.62554e-18	1.41299e-16
RIIAD1	41.0475	-1.90126	0.226219	-8.40448	4.29779e-17	1.97922e-15
PKHD1L1	1388.89	-1.89242	0.236504	-8.00166	1.22755e-15	4.76777e-14
LDLRAD1	536.195	-1.89174	0.182953	-10.34	4.64315e-25	6.37195e-23
DNAI1	192.697	-1.87303	0.192776	-9.71612	2.57408e-22	2.40852e-20
PAX9	142.507	-1.8672	0.286058	-6.52735	6.69452e-11	1.3203e-09
SCGB1D1	182.82	-1.85779	0.279843	-6.63867	3.16517e-11	6.54824e-10
GMNC	1137.17	-1.84048	0.23113	-7.96296	1.67976e-15	6.41818e-14
KIAA1324	3389.14	-1.81972	0.242645	-7.49951	6.40582e-14	1.99416e-12
FAM92B	70.8273	-1.80725	0.24283	-7.44244	9.88425e-14	2.97033e-12
ACY3	367.488	-1.79364	0.1965	-9.12797	6.97935e-20	4.67219e-18
CNGA4	36.3499	-1.79308	0.188774	-9.49855	2.12842e-21	1.77923e-19
LRRC71	65.5216	-1.7864	0.197087	-9.06399	1.25763e-19	7.99642e-18
CYP4B1	5133.77	-1.78515	0.200115	-8.92064	4.63596e-19	2.73638e-17
DIO1	71.8334	-1.78017	0.182207	-9.77001	1.51434e-22	1.46695e-20
KIF19	121.393	-1.77956	0.221819	-8.02257	1.03559e-15	4.06049e-14
LINC00671	16.4497	-1.76265	0.205187	-8.59047	8.66155e-18	4.45745e-16
ZNF295-AS1	51.5423	-1.75823	0.199666	-8.80584	1.29873e-18	7.32449e-17
MUC6	520.166	-1.74059	0.250437	-6.9502	3.64758e-12	8.64292e-11
EFCAB1	300.994	-1.72657	0.226401	-7.62616	2.41848e-14	7.95761e-13
CFAP77	143.719	-1.72434	0.240548	-7.16837	7.58966e-13	2.02243e-11
DRC1	211.514	-1.7146	0.198531	-8.63642	5.80027e-18	3.02275e-16
GDF3	34.0644	-1.69232	0.224785	-7.52861	5.12837e-14	1.62411e-12
WDR49	107.956	-1.6791	0.188829	-8.89218	5.99222e-19	3.48692e-17
C7orf57	172.446	-1.66999	0.185295	-9.01262	2.01184e-19	1.25022e-17
DUSP27	40.6385	-1.65379	0.222935	-7.41825	1.18679e-13	3.50882e-12
KPNA7	17.6294	-1.65299	0.172467	-9.58442	9.29749e-22	8.14421e-20
AZU1	11.0829	-1.63731	0.196096	-8.34956	6.85191e-17	3.08299e-15
CFAP74	113.55	-1.63202	0.219705	-7.42823	1.10064e-13	3.27765e-12
TFF2	65.6105	-1.62553	0.239701	-6.78151	1.18926e-11	2.62882e-10
UMODL1	94.6161	-1.62202	0.226152	-7.17226	7.37679e-13	1.97209e-11
CFAP100	144.21	-1.61049	0.204091	-7.89102	2.99715e-15	1.08956e-13
ZMYND10	782.273	-1.60516	0.156499	-10.2567	1.10461e-24	1.3886e-22
DNAAF1	251.163	-1.60171	0.168277	-9.51827	1.76089e-21	1.4871e-19
CFAP161	61.7385	-1.59955	0.172595	-9.26766	1.90267e-20	1.37426e-18
CFAP52	94.8588	-1.59092	0.147035	-10.82	2.76636e-27	5.84057e-25
FAM81B	203.219	-1.58447	0.217245	-7.2935	3.0201e-13	8.48721e-12
PAEP	811.09	-1.5828	0.249018	-6.3562	2.0681e-10	3.74565e-09
FAM3D	79.8105	-1.58199	0.234818	-6.73708	1.616e-11	3.50182e-10
PTPRR	188.216	-1.5548	0.21832	-7.12165	1.06644e-12	2.75639e-11
GAL	257.98	-1.5502	0.214182	-7.23776	4.5617e-13	1.25833e-11
CDHR3	250.601	-1.52729	0.158343	-9.64545	5.13856e-22	4.64955e-20
CR1L	34.8764	-1.51125	0.164793	-9.17061	4.70339e-20	3.20064e-18
DRC7	157.184	-1.50234	0.17684	-8.49547	1.97139e-17	9.49265e-16
NWD1	263.012	-1.48889	0.197788	-7.52771	5.16385e-14	1.63221e-12
MORN5	117.388	-1.48649	0.220545	-6.74008	1.58295e-11	3.44359e-10
TCTEX1D1	37.0021	-1.47535	0.189673	-7.7784	7.34457e-15	2.5517e-13
ANPEP	4365.76	-1.47091	0.181868	-8.08778	6.07614e-16	2.45501e-14
ANTXRL	118.253	-1.47061	0.226173	-6.50214	7.91833e-11	1.53591e-09
C2orf73	42.5296	-1.47024	0.174425	-8.42908	3.48396e-17	1.62532e-15
TRIM31	69.3305	-1.463	0.167167	-8.75169	2.10174e-18	1.14607e-16
PRSS33	1090.38	-1.4542	0.299409	-4.85689	1.19244e-06	1.07307e-05
CRISP3	348.873	-1.43814	0.295939	-4.85958	1.17637e-06	1.06092e-05
DNAH9	177.915	-1.43373	0.209903	-6.83043	8.46594e-12	1.90721e-10
WDR63	95.2236	-1.43161	0.18137	-7.89327	2.94367e-15	1.07249e-13
DMBT1	678.351	-1.43142	0.285771	-5.00898	5.47183e-07	5.27577e-06
DLEC1	234.775	-1.41941	0.151042	-9.39746	5.58959e-21	4.44683e-19
DAW1	87.4551	-1.4169	0.233661	-6.0639	1.32859e-09	2.08971e-08
CFAP45	421.497	-1.41447	0.160092	-8.83535	9.97866e-19	5.70585e-17
CAPSL	219.504	-1.41441	0.239403	-5.90807	3.46129e-09	5.06671e-08
SNX31	80.5182	-1.41339	0.215143	-6.56955	5.04681e-11	1.01479e-09
ABCG8	45.0282	-1.40385	0.194578	-7.21486	5.39893e-13	1.46958e-11
CYP4X1	1500.65	-1.40012	0.147624	-9.48434	2.43928e-21	2.0186e-19
MNX1	24.7448	-1.39704	0.247275	-5.64973	1.60698e-08	2.08705e-07
NXF3	83.3061	-1.38427	0.213123	-6.49517	8.29382e-11	1.60685e-09
CFAP65	156.512	-1.38058	0.225395	-6.12518	9.05797e-10	1.47252e-08
LRRC26	121.257	-1.37658	0.215165	-6.39779	1.57644e-10	2.90389e-09
DYDC2	282.004	-1.37646	0.125688	-10.9514	6.53997e-28	1.47535e-25
S100A7	184.63	-1.3726	0.295937	-4.63814	3.51564e-06	2.81319e-05
SLC25A48	95.7381	-1.36814	0.271085	-5.04689	4.49063e-07	4.37584e-06
SPDYC	35.8573	-1.36483	0.236143	-5.77965	7.48543e-09	1.02811e-07
PPP1R42	50.6655	-1.36401	0.171581	-7.94962	1.8708e-15	7.09871e-14
SLC51B	30.4252	-1.35949	0.172176	-7.89593	2.88157e-15	1.05403e-13
LCN2	22182	-1.35692	0.182697	-7.42716	1.1095e-13	3.29212e-12
CFAP73	183.982	-1.34824	0.170625	-7.90173	2.75062e-15	1.01563e-13
SPATA18	489.146	-1.34037	0.179459	-7.46893	8.08477e-14	2.47013e-12
CFAP57	231.191	-1.33245	0.165238	-8.0638	7.39596e-16	2.96342e-14
OMG	55.3695	-1.32949	0.162529	-8.18002	2.83798e-16	1.21392e-14
HLA-G	154.833	-1.3269	0.175919	-7.54265	4.6053e-14	1.46693e-12
CDH12	280.2	-1.32427	0.268351	-4.93485	8.02135e-07	7.45881e-06
RSPH1	605.668	-1.31713	0.134837	-9.76827	1.54065e-22	1.48371e-20
TMC1	66.5712	-1.31253	0.164345	-7.98643	1.38897e-15	5.31943e-14
CCNO	777.34	-1.31232	0.154723	-8.48175	2.21836e-17	1.06198e-15
USP53	4540.54	-1.30717	0.127127	-10.2824	8.46147e-25	1.12374e-22
LRRC46	377.948	-1.30593	0.154693	-8.44208	3.11744e-17	1.471e-15
CYP4Z1	100.017	-1.30265	0.174534	-7.4636	8.4188e-14	2.55324e-12
C2CD4B	409.033	-1.29889	0.187438	-6.92968	4.21787e-12	9.86646e-11
ENKUR	284.587	-1.29746	0.179471	-7.22936	4.85281e-13	1.33416e-11
SST	8761.61	-1.29013	0.286212	-4.50762	6.55593e-06	4.89767e-05
SCGB2A1	5477.21	-1.2875	0.205462	-6.26637	3.69562e-10	6.41977e-09
KIAA0319	119.582	-1.28389	0.168239	-7.63137	2.32278e-14	7.68103e-13
VNN3	79.3636	-1.27164	0.214212	-5.93635	2.91441e-09	4.3434e-08
DYDC1	17.6969	-1.26457	0.167488	-7.5502	4.34607e-14	1.39243e-12
VSTM1	40.4185	-1.26269	0.248195	-5.08751	3.62795e-07	3.61216e-06
FAIM2	630.314	-1.26231	0.209712	-6.01925	1.75227e-09	2.69435e-08
C16orf89	163.074	-1.26169	0.207403	-6.0833	1.17736e-09	1.87151e-08
C2CD4A	89.2827	-1.25767	0.228179	-5.51177	3.55246e-08	4.33027e-07
CD164L2	171.788	-1.25765	0.147307	-8.53761	1.37027e-17	6.77644e-16
MLC1	305.74	-1.25614	0.266561	-4.71238	2.44839e-06	2.04567e-05
LRRC55	917.461	-1.2522	0.211467	-5.9215	3.19025e-09	4.70763e-08
PLA2G2C	6.56528	-1.24937	0.168378	-7.42004	1.17085e-13	3.4679e-12
EFHB	115.955	-1.24304	0.155443	-7.99674	1.27761e-15	4.93888e-14
ZNF474	70.6569	-1.24021	0.175145	-7.08107	1.43044e-12	3.6185e-11
MIR205HG	738.221	-1.23967	0.251147	-4.93602	7.97326e-07	7.42668e-06
CCDC81	79.039	-1.23352	0.155467	-7.93431	2.11676e-15	7.92246e-14
VWA3A	390.584	-1.22812	0.218204	-5.62828	1.82014e-08	2.33262e-07
C5orf49	447.044	-1.22409	0.168925	-7.24632	4.28247e-13	1.18328e-11
RSPH4A	196.226	-1.22032	0.174064	-7.01077	2.37016e-12	5.79106e-11
GPR37L1	265.169	-1.21176	0.153417	-7.89849	2.8231e-15	1.03543e-13
CNGA1	102.23	-1.20962	0.172348	-7.01847	2.24306e-12	5.49683e-11
TMC5	693.974	-1.20614	0.149614	-8.06166	7.52667e-16	3.00119e-14
PSCA	340.303	-1.20587	0.234857	-5.13449	2.8291e-07	2.87946e-06
ZNF560	174.088	-1.20496	0.278965	-4.31941	1.56445e-05	0.000106504
CLDN10	3221.09	-1.2042	0.199298	-6.04221	1.52019e-09	2.36845e-08
BNIPL	1109.54	-1.20304	0.189553	-6.3467	2.19981e-10	3.96786e-09
RGS22	147.177	-1.20095	0.167616	-7.16491	7.7837e-13	2.06745e-11
ZBBX	127.822	-1.19958	0.21574	-5.56032	2.69282e-08	3.36205e-07
SYBU	1532.69	-1.19795	0.141459	-8.46852	2.48522e-17	1.18285e-15
EFCAB10	114.685	-1.19608	0.137322	-8.71003	3.03793e-18	1.62431e-16
PCK1	1777.1	-1.19448	0.239021	-4.99737	5.81185e-07	5.59051e-06
CPNE7	250.964	-1.18691	0.172791	-6.86906	6.46257e-12	1.47404e-10
ANKFN1	45.0775	-1.18669	0.205817	-5.76576	8.12895e-09	1.11093e-07
CCL25	87.0703	-1.18217	0.194527	-6.07715	1.22339e-09	1.9372e-08
CEACAM6	367.313	-1.17947	0.220843	-5.34077	9.25529e-08	1.04252e-06
PIFO	1076.28	-1.17865	0.162281	-7.26301	3.7856e-13	1.05306e-11
HOXD1	857.774	-1.17087	0.208662	-5.61131	2.00804e-08	2.54961e-07
GALR2	32.4104	-1.1695	0.184816	-6.32792	2.48482e-10	4.443e-09
IQUB	61.2249	-1.16661	0.160888	-7.25105	4.13552e-13	1.1446e-11
KCNB2	66.4924	-1.16161	0.214634	-5.41205	6.2308e-08	7.28756e-07
CXCL17	4566.65	-1.15988	0.231559	-5.009	5.47126e-07	5.27577e-06
SLC5A5	117.549	-1.15527	0.235898	-4.89732	9.71546e-07	8.87029e-06
TUBA3E	9.80875	-1.14507	0.186555	-6.13795	8.35922e-10	1.36839e-08
ARMC3	538.76	-1.14424	0.160011	-7.15097	8.61668e-13	2.25955e-11
SAA2	163.578	-1.14262	0.219222	-5.21217	1.8664e-07	1.96773e-06
ACE2	70.8783	-1.13629	0.154042	-7.37651	1.62495e-13	4.72785e-12
CYP21A2	84.0705	-1.13494	0.186089	-6.09891	1.06791e-09	1.71074e-08
CEACAM1	905.433	-1.13475	0.151268	-7.50162	6.30338e-14	1.96599e-12
SLC25A3P1	642.363	-1.13426	0.230298	-4.92521	8.42703e-07	7.79204e-06
SLC5A1	1210.39	-1.12616	0.213621	-5.27174	1.35133e-07	1.47084e-06
CYP2B7P	79.21	-1.12551	0.197996	-5.6845	1.31198e-08	1.72294e-07
DNAH3	281.094	-1.12498	0.125856	-8.93862	3.9407e-19	2.34279e-17
TEKT2	534.888	-1.12205	0.142887	-7.8527	4.07187e-15	1.46091e-13
GLDN	333.681	-1.12205	0.165725	-6.77055	1.28292e-11	2.82072e-10
PPP1R14D	53.0263	-1.12172	0.186318	-6.02047	1.73908e-09	2.67655e-08
CALN1	72.8282	-1.11393	0.24424	-4.5608	5.09579e-06	3.91041e-05
MYBPH	89.6598	-1.11338	0.179426	-6.20524	5.46147e-10	9.26256e-09
C2orf88	5701.32	-1.11154	0.176016	-6.315	2.70165e-10	4.79944e-09
CYP2J2	381.331	-1.1115	0.122523	-9.0718	1.17063e-19	7.50117e-18
CRABP1	6483.72	-1.10722	0.251507	-4.40234	1.0709e-05	7.60157e-05
AOC4P	25.7454	-1.10636	0.217755	-5.08073	3.7599e-07	3.7345e-06
NRG2	205.474	-1.09587	0.150632	-7.27517	3.4598e-13	9.67333e-12
ENPP3	133.564	-1.09556	0.20811	-5.26433	1.40699e-07	1.52136e-06
C2orf50	176.545	-1.09531	0.142199	-7.70263	1.33297e-14	4.51673e-13
CFAP53	196.353	-1.0911	0.115072	-9.48188	2.49745e-21	2.0564e-19
SFTPB	123.714	-1.08206	0.213173	-5.07595	3.85558e-07	3.81343e-06
MUC13	30.1042	-1.07942	0.204564	-5.27669	1.31539e-07	1.4355e-06
ANO3	34.4787	-1.07666	0.192052	-5.60609	2.06951e-08	2.61757e-07
DGKB	27.4424	-1.07499	0.24008	-4.47763	7.54768e-06	5.55771e-05
FOXJ1	5907.48	-1.06934	0.155143	-6.89258	5.47888e-12	1.26367e-10
ECT2L	28.3636	-1.06732	0.147756	-7.2235	5.06656e-13	1.38829e-11
IDO1	1613.07	-1.06514	0.184104	-5.78557	7.22683e-09	9.95079e-08
UNC5A	2100.63	-1.06095	0.202225	-5.24636	1.55136e-07	1.66435e-06
C6orf118	90.6131	-1.05701	0.210728	-5.016	5.27585e-07	5.10474e-06
MIA	27.3876	-1.05331	0.216951	-4.85509	1.20334e-06	1.08038e-05
SLC26A9	366.889	-1.04878	0.196063	-5.34921	8.83407e-08	1.00261e-06
SAXO2	191.98	-1.04787	0.140389	-7.46406	8.3896e-14	2.54908e-12
TCTEX1D4	59.1637	-1.04588	0.145526	-7.18695	6.6257e-13	1.78036e-11
ATP6V1C2	580.2	-1.04218	0.130385	-7.99312	1.31563e-15	5.0621e-14
CCDC78	442.786	-1.04133	0.146633	-7.10164	1.23287e-12	3.14287e-11
NXNL2	1140.21	-1.04077	0.15481	-6.72284	1.78222e-11	3.81659e-10
SNCG	5961.19	-1.03961	0.176181	-5.90082	3.61701e-09	5.27194e-08
VNN1	241.462	-1.03917	0.165565	-6.27654	3.46191e-10	6.03927e-09
CCDC96	174.418	-1.03388	0.122552	-8.43623	3.27739e-17	1.5333e-15
MYB	845.806	-1.033	0.118218	-8.73809	2.37082e-18	1.2843e-16
CATIP	83.7216	-1.03121	0.154733	-6.66448	2.65612e-11	5.56502e-10
AK7	316.863	-1.02881	0.128065	-8.03346	9.47648e-16	3.72455e-14
C4BPA	68.0833	-1.02379	0.244521	-4.18693	2.82758e-05	0.000178507
SPAG8	237.639	-1.02317	0.120122	-8.51779	1.62631e-17	7.97084e-16
TP53AIP1	72.2124	-1.02059	0.197341	-5.17171	2.31955e-07	2.39833e-06
TOGARAM2	140.808	-1.02037	0.173812	-5.87057	4.34307e-09	6.21928e-08
RIBC1	324.451	-1.01898	0.112289	-9.07458	1.14113e-19	7.36944e-18
PRR29	277.519	-1.01871	0.151318	-6.73226	1.67044e-11	3.60063e-10
STRA8	53.4231	-1.01795	0.229496	-4.4356	9.18156e-06	6.63749e-05
ZG16B	80.6138	-1.01788	0.131689	-7.72944	1.08021e-14	3.67538e-13
TNIP3	68.9316	-1.01562	0.205273	-4.94765	7.51149e-07	7.04437e-06
B3GALT5	238.782	-1.01542	0.22154	-4.58345	4.57363e-06	3.56622e-05
SLC23A1	156.479	-1.01451	0.171844	-5.9037	3.55444e-09	5.19383e-08
RARRES3	5242.39	-1.01397	0.141639	-7.15878	8.13953e-13	2.14707e-11
EFHC2	336.012	-1.01289	0.124168	-8.15741	3.42297e-16	1.44909e-14
CXCR2P1	218.231	-1.0123	0.203461	-4.97539	6.51171e-07	6.21651e-06
STPG4	17.1434	-1.01169	0.223131	-4.53408	5.78547e-06	4.37845e-05
UROC1	24.1269	-1.01123	0.192028	-5.26606	1.3938e-07	1.51008e-06
PGR	818.395	-1.0082	0.227395	-4.43372	9.2622e-06	6.69284e-05
CFAP157	571.283	-1.00677	0.120123	-8.38121	5.23871e-17	2.36359e-15
LINC00323	101.305	-1.00489	0.176416	-5.69614	1.22553e-08	1.61585e-07
SERPINA3	37.4406	-1.0042	0.219812	-4.56842	4.91406e-06	3.79696e-05
GJB1	2166.14	-1.00375	0.158799	-6.32087	2.60099e-10	4.6322e-09
C4orf51	7.56818	-1.00344	0.175955	-5.70286	1.17817e-08	1.55965e-07
ALOXE3	92.9379	-1.00152	0.162886	-6.14857	7.81836e-10	1.28368e-08
MSX1	1952.83	1.00038	0.22094	4.52785	5.95881e-06	4.4993e-05
AQP7	70.223	1.00063	0.187647	5.33248	9.68817e-08	1.08608e-06
GDF6	64.0504	1.00208	0.183909	5.4488	5.07111e-08	6.02968e-07
F7	25.1739	1.00211	0.195311	5.13082	2.88475e-07	2.93248e-06
MEX3B	309.8	1.00256	0.121858	8.22729	1.91495e-16	8.34272e-15
CREB3L1	2281.45	1.00363	0.128711	7.79753	6.31302e-15	2.22143e-13
TDO2	579.288	1.00393	0.181422	5.53369	3.1356e-08	3.86216e-07
CLEC4F	45.841	1.00403	0.193468	5.18968	2.10658e-07	2.19565e-06
SH3RF3	582.106	1.00566	0.11288	8.9091	5.14505e-19	3.02603e-17
FLRT3	740.731	1.00692	0.162583	6.1933	5.89188e-10	9.90077e-09
ADGRA2	1858.93	1.00998	0.112688	8.9626	3.17105e-19	1.93323e-17
FZD1	2570.46	1.01077	0.0936496	10.7932	3.70855e-27	7.63405e-25
BASP1	2355.79	1.01147	0.124338	8.13485	4.12451e-16	1.71955e-14
STMN3	1483.77	1.0119	0.137757	7.34555	2.04915e-13	5.89955e-12
CSMD2	368.848	1.0137	0.169575	5.97789	2.26048e-09	3.43093e-08
IGDCC4	372.594	1.01446	0.120737	8.40223	4.38084e-17	2.00957e-15
LY6H	122.699	1.01453	0.204503	4.96093	7.01556e-07	6.63762e-06
ACKR4	72.4619	1.0178	0.182992	5.56198	2.66727e-08	3.33268e-07
NDUFA4L2	3822.38	1.01785	0.167649	6.07128	1.26896e-09	2.00164e-08
GJC1	418.007	1.01815	0.125019	8.14393	3.82658e-16	1.6158e-14
GATA2	457.655	1.01847	0.19028	5.3525	8.67464e-08	9.85879e-07
HMCN1	1098.3	1.01858	0.114765	8.87539	6.96906e-19	4.02689e-17
TMEM119	981.754	1.01885	0.152339	6.68805	2.26171e-11	4.78738e-10
P4HA3	141.767	1.01897	0.115297	8.83781	9.76136e-19	5.60105e-17
F13A1	2013.25	1.01959	0.141868	7.18692	6.62715e-13	1.78036e-11
MRVI1	887.051	1.02032	0.119649	8.52759	1.49433e-17	7.34585e-16
GEM	351.289	1.02087	0.132757	7.68978	1.47386e-14	4.96349e-13
TMEM130	469.652	1.02099	0.155588	6.56214	5.30392e-11	1.06259e-09
PITX3	8.97223	1.02122	0.173738	5.87791	4.15473e-09	5.97555e-08
THPO	19.1395	1.02278	0.158692	6.44504	1.15572e-10	2.17762e-09
LMOD1	701.35	1.02322	0.1313	7.79302	6.54273e-15	2.28275e-13
CHRD	276.158	1.02486	0.137532	7.45182	9.20642e-14	2.78697e-12
LRFN5	37.9963	1.02554	0.207566	4.94079	7.78068e-07	7.27197e-06
C1QTNF2	57.8621	1.02583	0.12205	8.40498	4.27918e-17	1.97922e-15
DACT2	765.921	1.02664	0.194871	5.2683	1.37694e-07	1.49673e-06
SNORD17	210.153	1.02752	0.192146	5.34761	8.91236e-08	1.00872e-06
TNFAIP6	276.698	1.02959	0.147405	6.98482	2.85231e-12	6.8472e-11
SPX	367.884	1.03365	0.210538	4.90955	9.12837e-07	8.38873e-06
LRP4	1113.22	1.03522	0.202488	5.1125	3.17928e-07	3.21008e-06
COL12A1	11415.9	1.03575	0.138137	7.498	6.47981e-14	2.01339e-12
KLF14	34.2096	1.03654	0.202959	5.10714	3.27075e-07	3.29033e-06
PITX2	86.0542	1.03665	0.26029	3.98269	6.8141e-05	0.000387749
SLIT2	1309.54	1.03774	0.122845	8.44756	2.97449e-17	1.41164e-15
CCL26	15.2103	1.03889	0.162306	6.40078	1.54582e-10	2.85388e-09
TLL2	59.5322	1.04041	0.162111	6.41788	1.38181e-10	2.56945e-09
GRIA3	29.4802	1.04268	0.150615	6.92277	4.42884e-12	1.03014e-10
SERPINB2	345.283	1.04433	0.238318	4.3821	1.17542e-05	8.26863e-05
LAMB1	3739.18	1.04544	0.102933	10.1565	3.09953e-24	3.75317e-22
MAPT	222.186	1.04724	0.148524	7.05096	1.77686e-12	4.41349e-11
CRISPLD1	734.618	1.04809	0.154345	6.79057	1.11691e-11	2.48222e-10
ZCCHC24	1400.06	1.04813	0.102112	10.2645	1.01867e-24	1.31935e-22
IRX6	117.405	1.04883	0.243996	4.29857	1.71904e-05	0.000115831
FIGNL2	139.269	1.04984	0.164153	6.39548	1.60043e-10	2.93822e-09
ACAN	114.01	1.05089	0.177632	5.91609	3.29682e-09	4.8475e-08
TMEM45A	1070.86	1.05173	0.105688	9.95122	2.49106e-23	2.62966e-21
CTNNA3	22.8525	1.05262	0.17199	6.12022	9.34488e-10	1.5117e-08
SLC26A7	381.731	1.05373	0.213801	4.92857	8.28333e-07	7.68507e-06
FIBIN	702.245	1.05558	0.137902	7.65454	1.94006e-14	6.48052e-13
RBP2	25.1269	1.05561	0.167102	6.31718	2.66382e-10	4.73734e-09
BICC1	705.875	1.05709	0.133079	7.94335	1.96792e-15	7.43297e-14
PTCHD1	52.1775	1.05859	0.226627	4.67107	2.99628e-06	2.44359e-05
BEX1	525.395	1.05943	0.258892	4.09216	4.27373e-05	0.00025733
CES1	164.008	1.06065	0.202493	5.23798	1.62345e-07	1.73378e-06
RCN3	3338.85	1.06076	0.110003	9.64308	5.25843e-22	4.73202e-20
ADAMTSL2	436.752	1.06143	0.116806	9.08713	1.01688e-19	6.61895e-18
SALL4	311	1.0623	0.165523	6.41782	1.3824e-10	2.56945e-09
KCNC1	30.976	1.06297	0.215965	4.92196	8.56818e-07	7.90924e-06
OLFML1	733.421	1.06366	0.118683	8.96224	3.18136e-19	1.93323e-17
IL6	176.107	1.06413	0.182244	5.83906	5.24949e-09	7.40777e-08
LRRN3	48.3163	1.0642	0.126076	8.4409	3.149e-17	1.48165e-15
ACTN2	40.9705	1.06489	0.183121	5.81526	6.05406e-09	8.44186e-08
PAPPA	108.159	1.0653	0.171467	6.21285	5.20333e-10	8.85211e-09
SHISA6	27.7383	1.0663	0.177268	6.01523	1.79637e-09	2.75957e-08
ABCA6	112.924	1.06645	0.147645	7.22309	5.08204e-13	1.39022e-11
MEST	13549.3	1.06688	0.129887	8.21391	2.14093e-16	9.25376e-15
MEG3	2025.87	1.06767	0.165576	6.44821	1.13179e-10	2.13987e-09
HIST1H2BM	16.5308	1.0677	0.200244	5.33199	9.71429e-08	1.08752e-06
SDK1	1559.34	1.06869	0.149463	7.15024	8.66256e-13	2.26797e-11
SLC1A7	23.3061	1.0704	0.164052	6.52477	6.81053e-11	1.33837e-09
WSCD2	158.759	1.07041	0.253854	4.21662	2.47991e-05	0.000159465
LGI2	273.861	1.07129	0.13541	7.91145	2.54414e-15	9.41505e-14
PHLDB2	679.278	1.0749	0.125013	8.59831	8.08997e-18	4.18949e-16
GFPT2	619.904	1.07501	0.127642	8.42211	3.69763e-17	1.71529e-15
ADAMTS10	485.556	1.07675	0.118374	9.09619	9.35561e-20	6.13817e-18
ZNF521	974.936	1.08048	0.166387	6.49376	8.37197e-11	1.62009e-09
FOXF1	102.455	1.08262	0.123836	8.74236	2.28297e-18	1.24079e-16
CDH4	87.4614	1.08336	0.20373	5.31759	1.05149e-07	1.17078e-06
GABRA5	21.2643	1.08524	0.210548	5.15433	2.54534e-07	2.60561e-06
SAMD5	137.059	1.08642	0.131477	8.26314	1.41892e-16	6.23113e-15
FXYD7	380.106	1.08665	0.234345	4.63694	3.53605e-06	2.82678e-05
COL25A1	186.534	1.08679	0.216896	5.01068	5.42387e-07	5.23873e-06
FGF18	2741.47	1.08702	0.143107	7.59584	3.05798e-14	9.9327e-13
NBL1	2881.08	1.08936	0.116405	9.35842	8.09374e-21	6.17073e-19
NR2F1	1376.2	1.08938	0.131514	8.28342	1.19689e-16	5.29851e-15
HRC	37.5394	1.09022	0.152436	7.15199	8.55291e-13	2.2464e-11
JPH2	288.701	1.09025	0.146641	7.43483	1.04702e-13	3.13497e-12
PDGFD	857.922	1.09105	0.116122	9.39574	5.68157e-21	4.49827e-19
RAB3B	293.293	1.09111	0.162034	6.73384	1.65245e-11	3.57343e-10
RHOBTB3	1409.84	1.09112	0.11739	9.29481	1.47476e-20	1.07939e-18
PKIA	391.742	1.09146	0.168289	6.48563	8.83612e-11	1.70191e-09
ENOX1	138.562	1.0932	0.119566	9.14306	6.07106e-20	4.09747e-18
GPR68	174.704	1.09366	0.127698	8.56449	1.08558e-17	5.5007e-16
PDGFRA	1644.24	1.09553	0.146457	7.48021	7.42047e-14	2.29269e-12
TMEM200A	352.449	1.09722	0.121169	9.05528	1.36212e-19	8.62745e-18
NGF	81.6594	1.09772	0.153233	7.16372	7.85189e-13	2.08221e-11
THBS1	13421.7	1.10016	0.129284	8.50966	1.74437e-17	8.51292e-16
LOXL2	2688.83	1.10177	0.104131	10.5806	3.66759e-26	6.10079e-24
NTRK3	219.934	1.10271	0.242696	4.54358	5.53065e-06	4.20882e-05
CILP2	1718.29	1.1037	0.129097	8.54933	1.23802e-17	6.14085e-16
KRT17	5424.88	1.10441	0.15991	6.90648	4.96815e-12	1.15071e-10
LZTS1	494.36	1.1055	0.111014	9.9582	2.32239e-23	2.48345e-21
MAPK4	81.1781	1.10906	0.203459	5.45102	5.00828e-08	5.96668e-07
ARSE	109.259	1.11006	0.189394	5.86114	4.59692e-09	6.54862e-08
MSRB3	1020.82	1.11121	0.108273	10.2631	1.0335e-24	1.31935e-22
GHR	231.076	1.11124	0.141272	7.86593	3.66357e-15	1.32306e-13
ADAM33	647.141	1.11236	0.17232	6.45516	1.08102e-10	2.04624e-09
SCARNA6	27.0807	1.11388	0.19739	5.64305	1.67062e-08	2.16458e-07
KCNE5	43.0037	1.11493	0.189505	5.8834	4.01932e-09	5.80107e-08
FSTL1	10110.9	1.1161	0.0958704	11.6417	2.52912e-31	1.08134e-28
CNTN1	757.7	1.11615	0.153924	7.25131	4.12756e-13	1.14432e-11
TWIST1	608.271	1.11621	0.165781	6.73304	1.66155e-11	3.58616e-10
KCNIP1	245.279	1.11673	0.208056	5.36742	7.98712e-08	9.13613e-07
PAPPA2	31.3436	1.11772	0.171707	6.50942	7.54397e-11	1.46503e-09
FMO1	307.477	1.11779	0.163739	6.82665	8.69193e-12	1.95545e-10
PMEPA1	3890.78	1.11931	0.122136	9.16445	4.98011e-20	3.37499e-18
WNT4	423.394	1.12038	0.151387	7.40076	1.35409e-13	3.9891e-12
RGPD3	15.5217	1.12184	0.154323	7.26941	3.61049e-13	1.00776e-11
INHBA-AS1	12.2288	1.1249	0.16051	7.00827	2.41283e-12	5.87789e-11
FGFR3	1308.44	1.12727	0.184199	6.11986	9.36548e-10	1.51355e-08
KIAA1755	100.694	1.12759	0.142188	7.9303	2.18609e-15	8.14491e-14
NDNF	138.458	1.12824	0.18221	6.19195	5.94255e-10	9.96557e-09
COPZ2	557.786	1.13041	0.122182	9.25182	2.20705e-20	1.5734e-18
PLCH2	235.631	1.13329	0.182087	6.22389	4.84969e-10	8.27614e-09
ANTXR1	9532.24	1.13631	0.107276	10.5924	3.2323e-26	5.43159e-24
PRICKLE1	714.978	1.13723	0.131409	8.65414	4.9666e-18	2.62147e-16
SORCS2	522.41	1.13799	0.172214	6.60802	3.89498e-11	7.93652e-10
CAMK2A	14.2225	1.14005	0.176419	6.46215	1.03226e-10	1.96069e-09
GDF7	34.7957	1.14071	0.159642	7.14545	8.9704e-13	2.33741e-11
ACKR3	2071.71	1.14101	0.122308	9.32902	1.06856e-20	7.92657e-19
TMEM132B	474.924	1.14218	0.201824	5.65927	1.52022e-08	1.98218e-07
GABRQ	82.317	1.14247	0.216153	5.28546	1.2539e-07	1.37661e-06
LOXL1	4160.31	1.14363	0.0998941	11.4484	2.39399e-30	8.21338e-28
NEDD9	3480.87	1.14429	0.133272	8.58615	8.99348e-18	4.59952e-16
COL6A5	43.0148	1.14545	0.225957	5.06932	3.99234e-07	3.9331e-06
TWIST2	322.764	1.14702	0.170034	6.74578	1.52202e-11	3.3167e-10
CPLX2	943.286	1.14754	0.28382	4.04319	5.27282e-05	0.000309395
HIF3A	2344.5	1.15063	0.17477	6.58369	4.58905e-11	9.25001e-10
SCARF2	2377.63	1.15444	0.102465	11.2667	1.91663e-29	5.34967e-27
EMILIN3	109.588	1.15608	0.188997	6.11691	9.54069e-10	1.54035e-08
TGFB3	856.33	1.15627	0.11649	9.92593	3.21111e-23	3.34687e-21
TNNC1	501.079	1.15642	0.204289	5.66071	1.50747e-08	1.96712e-07
MME	551.915	1.15903	0.166404	6.96517	3.28017e-12	7.80604e-11
TNN	33.4207	1.15907	0.175557	6.60227	4.049e-11	8.22181e-10
COL6A1	33532.4	1.16201	0.12474	9.31545	1.21432e-20	8.92744e-19
CCL19	62.142	1.163	0.217438	5.34867	8.86033e-08	1.0049e-06
DACT1	416.274	1.16551	0.124511	9.36071	7.92011e-21	6.06644e-19
MYL4	18.2543	1.16555	0.151722	7.68215	1.56441e-14	5.25771e-13
LEP	18.036	1.16641	0.181481	6.42717	1.30004e-10	2.42951e-09
MMP14	14604.2	1.17627	0.102322	11.4957	1.38686e-30	4.99656e-28
RAMP2-AS1	75.9617	1.17701	0.167071	7.04497	1.85505e-12	4.60075e-11
CCL11	248.705	1.17731	0.230317	5.11169	3.19287e-07	3.22182e-06
ADGRD1	235.538	1.17884	0.177236	6.65125	2.90619e-11	6.05812e-10
LPAR4	43.087	1.17927	0.127977	9.21473	3.12068e-20	2.1776e-18
MMP23B	146.126	1.17952	0.129783	9.08838	1.00523e-19	6.56908e-18
BMPER	48.9995	1.17991	0.151203	7.80343	6.02461e-15	2.12448e-13
AK5	110.069	1.17992	0.156559	7.53661	4.82343e-14	1.53049e-12
HIC1	760.057	1.18282	0.110559	10.6986	1.03379e-26	1.87081e-24
ELN	3544.68	1.18293	0.154803	7.64155	2.14615e-14	7.11123e-13
WNT7A	3471.43	1.18376	0.192882	6.13721	8.39823e-10	1.37341e-08
ANGPTL2	2062.04	1.18537	0.101084	11.7266	9.31355e-32	4.64774e-29
VCAM1	1634.03	1.18707	0.153141	7.75151	9.08039e-15	3.11533e-13
NUDT11	113.352	1.18779	0.160883	7.38295	1.54816e-13	4.51241e-12
CHGB	67.8274	1.18861	0.196291	6.05533	1.40131e-09	2.19361e-08
TUBB2B	887.36	1.18891	0.278367	4.27102	1.94585e-05	0.00012864
FBLN2	3080.76	1.18961	0.15808	7.52541	5.25558e-14	1.65802e-12
SOSTDC1	762.487	1.1934	0.235971	5.05739	4.25041e-07	4.16394e-06
SV2B	24.7338	1.1947	0.169074	7.06612	1.59324e-12	4.00572e-11
PI15	151.31	1.19506	0.186843	6.39607	1.59422e-10	2.93009e-09
DOK6	84.7203	1.19728	0.124726	9.59931	8.04792e-22	7.12544e-20
SIM2	403.323	1.19744	0.221216	5.413	6.19773e-08	7.25919e-07
ECM2	452.465	1.19807	0.127002	9.43349	3.9667e-21	3.21791e-19
COLEC12	1222.06	1.19849	0.12974	9.2376	2.52088e-20	1.78171e-18
PLAU	4240.36	1.1989	0.142802	8.39555	4.63716e-17	2.10952e-15
PCDH9	103.055	1.20131	0.181626	6.61421	3.73552e-11	7.6418e-10
FLRT2	873.083	1.20395	0.140123	8.59208	8.54098e-18	4.40918e-16
CBLN4	35.6688	1.20434	0.184749	6.51877	7.08868e-11	1.38553e-09
HSPB7	262.541	1.20437	0.139231	8.65014	5.14351e-18	2.70618e-16
SYN3	19.1301	1.20577	0.171787	7.019	2.23463e-12	5.48433e-11
PTCHD4	34.914	1.20578	0.158754	7.59526	3.07178e-14	9.95789e-13
EPHA3	108.765	1.20612	0.143621	8.39795	4.54349e-17	2.07264e-15
ETV1	793.368	1.20779	0.121295	9.95748	2.33909e-23	2.48517e-21
CYTL1	211.681	1.20796	0.191049	6.32277	2.56913e-10	4.5838e-09
C1QTNF7	212.74	1.20876	0.137547	8.78792	1.52357e-18	8.47639e-17
ADRA2A	1092.57	1.20936	0.170136	7.10822	1.17546e-12	3.01517e-11
CD207	141.811	1.21001	0.19452	6.22051	4.95528e-10	8.44757e-09
SALL1	419.447	1.21303	0.256185	4.73496	2.19094e-06	1.85694e-05
AOC3	507.542	1.21405	0.145699	8.33257	7.91068e-17	3.54003e-15
C1QTNF6	1808.79	1.21698	0.105085	11.5809	5.14823e-31	2.06783e-28
CDK5R2	45.2252	1.21887	0.189799	6.4219	1.34581e-10	2.50994e-09
TCEAL7	110.897	1.21897	0.134417	9.06854	1.20617e-19	7.69892e-18
ADCY2	92.9315	1.21912	0.241534	5.04742	4.47827e-07	4.36638e-06
TRIL	1174.61	1.21971	0.127635	9.55624	1.22112e-21	1.04737e-19
EYA4	980.215	1.22009	0.208276	5.85803	4.68402e-09	6.65543e-08
KCNJ15	96.5103	1.22258	0.154763	7.89974	2.79475e-15	1.02885e-13
BCHE	129.418	1.2282	0.2338	5.25321	1.49468e-07	1.60669e-06
MDFI	1826.75	1.22966	0.16313	7.53791	4.77573e-14	1.51828e-12
COL16A1	2485.56	1.23082	0.117975	10.4329	1.75362e-25	2.60167e-23
GPR88	23.1662	1.23128	0.175334	7.02249	2.17951e-12	5.36504e-11
PDGFRB	4323.52	1.23148	0.111747	11.0203	3.05087e-28	7.1774e-26
FAM225B	13.0738	1.23204	0.167967	7.33503	2.21672e-13	6.35974e-12
BRSK2	155.766	1.23418	0.191829	6.43377	1.24473e-10	2.33466e-09
SRPX	567.042	1.23498	0.114601	10.7763	4.45653e-27	8.95001e-25
KIRREL2	139.864	1.23557	0.222924	5.54257	2.98064e-08	3.69339e-07
GREM2	44.6694	1.23565	0.176013	7.0202	2.21544e-12	5.44536e-11
CCL14	16.6021	1.23654	0.192828	6.41268	1.42988e-10	2.65471e-09
MMP16	115.046	1.23654	0.143019	8.64603	5.33242e-18	2.79663e-16
TNFSF4	400.062	1.23693	0.125037	9.89252	4.48573e-23	4.64597e-21
COL6A2	32501.1	1.2374	0.123081	10.0536	8.86029e-24	9.99392e-22
ADAMTSL1	347.609	1.23852	0.155989	7.93977	2.02557e-15	7.59842e-14
LAMA1	982.591	1.23861	0.176546	7.01577	2.28679e-12	5.59566e-11
NUAK1	1290.56	1.24138	0.111156	11.1679	5.85521e-29	1.50662e-26
EDNRA	787.348	1.24142	0.130159	9.53776	1.45954e-21	1.24538e-19
CD248	1620.75	1.24264	0.124051	10.0171	1.28165e-23	1.4261e-21
BAMBI	461.092	1.24372	0.170425	7.29776	2.92609e-13	8.23706e-12
SCN4A	44.1312	1.24401	0.193014	6.44516	1.15482e-10	2.17762e-09
SPINK1	30.9446	1.24634	0.238225	5.23179	1.67873e-07	1.78742e-06
TPSB2	133.989	1.24833	0.231896	5.38313	7.31997e-08	8.42384e-07
C10orf82	108.155	1.24861	0.185818	6.71952	1.82323e-11	3.89429e-10
FAM84A	1657.11	1.24867	0.183609	6.8007	1.04112e-11	2.32004e-10
FBN3	2016.96	1.25684	0.200971	6.25383	4.00512e-10	6.90643e-09
DPP4	606.774	1.2571	0.179604	6.99929	2.57266e-12	6.21211e-11
CRYM	52.1413	1.2617	0.220209	5.72953	1.00708e-08	1.35828e-07
FAM155A	117.729	1.26272	0.136002	9.2846	1.62315e-20	1.18274e-18
COL6A6	220.296	1.26625	0.225417	5.61737	1.93884e-08	2.47319e-07
SMOC1	85.7574	1.26962	0.21695	5.85214	4.85276e-09	6.87739e-08
HHIP	87.8356	1.27452	0.168682	7.55579	4.1632e-14	1.33905e-12
ANGPTL1	321.568	1.27496	0.191656	6.65236	2.88425e-11	6.02e-10
BGN	29844.5	1.27497	0.114653	11.1202	1.00056e-28	2.45928e-26
ECM1	1840.12	1.27578	0.136386	9.35419	8.4245e-21	6.36398e-19
CHSY3	139.676	1.27582	0.123366	10.3417	4.56335e-25	6.31506e-23
ANGPT1	178.472	1.28	0.145282	8.81045	1.24639e-18	7.05345e-17
EDIL3	935.883	1.28071	0.140698	9.10259	8.82013e-20	5.85685e-18
MXRA8	7565.54	1.28277	0.13711	9.35572	8.30313e-21	6.3012e-19
SLIT3	3411.67	1.28321	0.136289	9.41541	4.71218e-21	3.767e-19
ZNF385D	38.0227	1.29003	0.147322	8.75654	2.01334e-18	1.10519e-16
OXT	14.5298	1.2905	0.151807	8.50088	1.88152e-17	9.08646e-16
FGF9	355.222	1.29199	0.194317	6.64888	2.95322e-11	6.14061e-10
CORIN	115.491	1.29364	0.175657	7.36457	1.77716e-13	5.16159e-12
KIAA1549L	322.483	1.29408	0.175223	7.38532	1.52088e-13	4.44075e-12
COL5A3	1298.34	1.29447	0.159671	8.10714	5.18252e-16	2.12832e-14
XIRP1	39.7092	1.29511	0.194314	6.66504	2.64585e-11	5.55056e-10
RGS16	1310.03	1.29768	0.120699	10.7513	5.84318e-27	1.1189e-24
LHX1	2609.15	1.29793	0.294143	4.41257	1.02148e-05	7.28847e-05
HOXA7	78.006	1.29854	0.222296	5.84149	5.1736e-09	7.30694e-08
GPR17	85.628	1.3016	0.204354	6.36932	1.89867e-10	3.44353e-09
MN1	798.699	1.30438	0.14329	9.10308	8.78042e-20	5.85409e-18
PLPPR4	244.21	1.30573	0.152701	8.55092	1.22107e-17	6.09353e-16
DKK1	42.4701	1.3078	0.259695	5.03592	4.75568e-07	4.62045e-06
GRID1	175.624	1.30968	0.159025	8.23568	1.78537e-16	7.79879e-15
LRRC4B	263.737	1.31074	0.159628	8.2112	2.18989e-16	9.4406e-15
ACTA2	10120.9	1.31111	0.139966	9.36734	7.43849e-21	5.75103e-19
PLXNA4	1246.67	1.31114	0.207113	6.33056	2.44273e-10	4.37249e-09
DKK2	255.141	1.3135	0.133836	9.81429	9.772e-23	9.57889e-21
CLDN9	1403.95	1.31474	0.172713	7.61228	2.69299e-14	8.81672e-13
NPHS1	59.881	1.32064	0.230872	5.7202	1.06397e-08	1.42548e-07
FNDC1	2658.4	1.32201	0.158848	8.32248	8.6144e-17	3.8445e-15
XYLT1	390.359	1.32732	0.140075	9.47576	2.64833e-21	2.15904e-19
FLNC	2081.71	1.32753	0.161463	8.22185	2.00394e-16	8.68445e-15
TM4SF4	25.3649	1.32788	0.236766	5.6084	2.04207e-08	2.58683e-07
SCT	39.7392	1.32906	0.148057	8.97666	2.79102e-19	1.70864e-17
TNNT3	116.007	1.33018	0.239843	5.54602	2.9224e-08	3.63215e-07
BHLHE22	42.6021	1.33102	0.193689	6.87195	6.33309e-12	1.44651e-10
ADAMTS5	604.921	1.33497	0.151813	8.79352	1.44949e-18	8.14683e-17
PTPRD	360.777	1.33565	0.176544	7.56555	3.86238e-14	1.24473e-12
ZNF114	88.9597	1.33637	0.164212	8.13811	4.01487e-16	1.68236e-14
PLA2G2A	302.731	1.33653	0.247648	5.3969	6.78025e-08	7.86318e-07
FAM180A	119.493	1.33702	0.151056	8.85119	8.65884e-19	4.9858e-17
CAPN6	811.006	1.33727	0.239266	5.58903	2.28342e-08	2.87488e-07
VAT1L	86.1311	1.34102	0.165353	8.11004	5.06035e-16	2.08335e-14
CDH11	4353.77	1.34263	0.13194	10.1761	2.53552e-24	3.11604e-22
OSR1	257.5	1.34486	0.159226	8.44622	3.00893e-17	1.42388e-15
FGF1	210.3	1.34671	0.148333	9.07896	1.09621e-19	7.10723e-18
GALNT15	159.624	1.34732	0.146766	9.18009	4.30728e-20	2.95551e-18
EMILIN1	4405.02	1.34751	0.130435	10.3309	5.1084e-25	6.95249e-23
MFAP2	6565.03	1.34813	0.142958	9.43022	4.09228e-21	3.30352e-19
SOX8	19.0186	1.34906	0.157646	8.55749	1.15347e-17	5.80896e-16
NEGR1	144.263	1.35178	0.174079	7.76532	8.14411e-15	2.8058e-13
ADAMTS7	848.469	1.35396	0.120938	11.1955	4.29167e-29	1.13992e-26
TNNT2	558.953	1.35529	0.210833	6.42826	1.29072e-10	2.4154e-09
FOXC2	37.7447	1.35841	0.177447	7.65531	1.92841e-14	6.45467e-13
NOG	142.745	1.35842	0.192446	7.05871	1.68058e-12	4.18064e-11
HTRA3	1448.81	1.35934	0.140591	9.66877	4.09252e-22	3.76511e-20
ISLR2	260.3	1.36079	0.186947	7.27902	3.36262e-13	9.41762e-12
DLX5	268.068	1.36156	0.212917	6.3948	1.60753e-10	2.94797e-09
RUNX1T1	304.057	1.36187	0.166541	8.17738	2.90092e-16	1.23762e-14
LSAMP	270.605	1.36286	0.169238	8.05289	8.08601e-16	3.20869e-14
DCHS1	1774.53	1.36305	0.117078	11.6422	2.51467e-31	1.08134e-28
MAB21L2	36.0868	1.36402	0.246325	5.53749	3.06842e-08	3.79036e-07
F2RL2	69.3985	1.36655	0.196087	6.96913	3.18918e-12	7.61151e-11
CALB2	421.204	1.36689	0.189394	7.21721	5.30637e-13	1.44917e-11
KCNJ4	54.6121	1.36926	0.231187	5.92276	3.16574e-09	4.67564e-08
TH	29.0325	1.37003	0.206879	6.62238	3.53458e-11	7.27593e-10
CILP	1551.58	1.37109	0.168367	8.14342	3.84254e-16	1.61839e-14
CTHRC1	4161.19	1.37257	0.138883	9.88291	4.93758e-23	5.05044e-21
SHOX2	84.1537	1.37279	0.190853	7.19293	6.34147e-13	1.70919e-11
GJB2	1715.73	1.37309	0.176142	7.79532	6.42431e-15	2.25577e-13
WSCD1	114.321	1.37341	0.169816	8.08766	6.08235e-16	2.45501e-14
TSPAN18	1260.19	1.37353	0.123167	11.1517	7.02539e-29	1.75294e-26
ST8SIA2	323.508	1.37607	0.183049	7.51752	5.58269e-14	1.75785e-12
PCDHGB1	204.349	1.38172	0.197649	6.99079	2.73336e-12	6.59047e-11
ZNF469	1688.51	1.38319	0.139831	9.89186	4.51574e-23	4.64782e-21
SPSB4	160.351	1.38331	0.228393	6.05671	1.38931e-09	2.1769e-08
SIX2	283.55	1.38573	0.216786	6.39218	1.63532e-10	2.99227e-09
NCAM2	75.1439	1.38813	0.185674	7.47617	7.65175e-14	2.35091e-12
OLFML2B	2003.86	1.38885	0.136611	10.1664	2.79956e-24	3.41505e-22
PNOC	4793.69	1.39096	0.220562	6.30641	2.85583e-10	5.05154e-09
PVALB	123.19	1.39168	0.224295	6.20469	5.48032e-10	9.28497e-09
MAFA	62.5161	1.39194	0.221118	6.29501	3.0739e-10	5.40245e-09
CD36	641.893	1.39326	0.155132	8.98113	2.68012e-19	1.64687e-17
TMEM145	44.4143	1.39518	0.175259	7.96068	1.71099e-15	6.52237e-14
COL1A2	134052	1.39619	0.132072	10.5714	4.04277e-26	6.59171e-24
TMEM158	1134.81	1.40011	0.162506	8.61571	6.95082e-18	3.61092e-16
WNT11	1978.53	1.40066	0.195649	7.15908	8.12226e-13	2.14699e-11
BMP4	768.583	1.40287	0.142922	9.8156	9.64601e-23	9.51201e-21
PDLIM3	2007.21	1.40321	0.145048	9.67408	3.88575e-22	3.59497e-20
SUGCT	333.757	1.40589	0.129765	10.8341	2.37239e-27	5.07384e-25
LOX	2842.63	1.40602	0.150327	9.35306	8.51499e-21	6.40296e-19
TCF7L1	2250.53	1.40719	0.138889	10.1317	3.99655e-24	4.7349e-22
SGCA	23.7223	1.4131	0.179173	7.88681	3.09999e-15	1.12446e-13
FLRT1	81.863	1.41354	0.188772	7.48811	6.98715e-14	2.16694e-12
HMGA2	3500.57	1.41428	0.21227	6.66267	2.68904e-11	5.62683e-10
SPARC	85072.7	1.41489	0.116167	12.1798	3.9813e-34	3.85671e-31
SNAI2	831.327	1.41904	0.132186	10.7352	6.95561e-27	1.28702e-24
GALNT9	125.573	1.4198	0.219099	6.48017	9.16218e-11	1.75649e-09
TSPAN11	226.396	1.42175	0.147949	9.60973	7.27417e-22	6.51038e-20
COL6A3	23819.7	1.42529	0.135136	10.5471	5.24062e-26	8.46103e-24
RGS4	651.88	1.42622	0.143337	9.95016	2.51781e-23	2.64097e-21
SERPINF1	5892.36	1.42845	0.140253	10.1848	2.31722e-24	2.86917e-22
SSC5D	1225.17	1.43305	0.136641	10.4877	9.84257e-26	1.52913e-23
CCL21	399.353	1.43582	0.273984	5.2405	1.6014e-07	1.71246e-06
CCDC80	6303.4	1.43627	0.142027	10.1127	4.85436e-24	5.66962e-22
PTGIS	2825.02	1.43906	0.154455	9.31701	1.19669e-20	8.83724e-19
GPR1	115.135	1.43909	0.160904	8.94379	3.76051e-19	2.26843e-17
LRRN4	614.831	1.44136	0.166423	8.66083	4.68331e-18	2.4799e-16
GRIN2B	25.4639	1.44585	0.221978	6.51348	7.34314e-11	1.42939e-09
DLL1	306.128	1.44592	0.13848	10.4413	1.60516e-25	2.40306e-23
SCG2	258.781	1.44869	0.183389	7.89956	2.79892e-15	1.02885e-13
PRKG1	230.335	1.45457	0.116535	12.4819	9.37579e-36	1.40364e-32
BIRC7	26.7825	1.45566	0.206176	7.06027	1.66175e-12	4.14633e-11
NTSR1	36.4635	1.45587	0.183345	7.94061	2.0119e-15	7.56439e-14
GPC6	928.117	1.45813	0.145035	10.0536	8.85275e-24	9.99392e-22
KIF26A	250.804	1.45878	0.162404	8.98241	2.64891e-19	1.63379e-17
CD300LG	26.1878	1.46167	0.212978	6.863	6.74279e-12	1.53583e-10
GLT8D2	743.154	1.46982	0.117453	12.5141	6.24832e-36	1.02897e-32
CPXM2	1717.44	1.47001	0.201388	7.29938	2.89102e-13	8.15229e-12
TRHDE	171.781	1.47361	0.281561	5.2337	1.6615e-07	1.77098e-06
GFAP	160.61	1.47582	0.236201	6.24814	4.15378e-10	7.13289e-09
PDPN	1802.22	1.47622	0.126816	11.6406	2.56087e-31	1.08134e-28
PCOLCE	5771	1.47876	0.117678	12.5661	3.24272e-36	5.93347e-33
MEDAG	344.707	1.48334	0.157982	9.38927	6.04194e-21	4.73803e-19
TLL1	89.7395	1.48467	0.178504	8.31729	8.99988e-17	4.00568e-15
CLDN6	8291.05	1.4857	0.236176	6.29062	3.16202e-10	5.53959e-09
TBX1	280.658	1.48604	0.203941	7.28664	3.1778e-13	8.91517e-12
DPP10	178.626	1.48771	0.270805	5.49367	3.93677e-08	4.75647e-07
POMC	85.0599	1.48788	0.17393	8.55447	1.18408e-17	5.94493e-16
IGFL2	194.779	1.48913	0.226124	6.58547	4.53445e-11	9.16236e-10
SMTNL2	117.943	1.49135	0.218194	6.83498	8.20186e-12	1.85754e-10
DACT3	370.583	1.49312	0.120765	12.3639	4.09969e-35	5.62614e-32
DCN	21106.3	1.4949	0.145556	10.2703	9.58806e-25	1.25314e-22
POU3F1	33.7701	1.49913	0.163273	9.18173	4.24218e-20	2.92302e-18
APCDD1L	125.369	1.50201	0.172979	8.68321	3.84747e-18	2.04469e-16
MATN3	237.746	1.50279	0.119063	12.6217	1.60228e-36	3.29829e-33
VTN	69.7301	1.5084	0.160717	9.38545	6.26474e-21	4.88946e-19
PDE1C	58.9852	1.50947	0.163751	9.21808	3.02467e-20	2.11959e-18
PI16	26.6074	1.51178	0.209616	7.21214	5.50793e-13	1.49678e-11
PTPRN	116.145	1.51274	0.145374	10.4059	2.33151e-25	3.39781e-23
ADAMTS18	93.3834	1.51276	0.188639	8.01933	1.06324e-15	4.15901e-14
PODN	1295.31	1.51374	0.152005	9.95847	2.31598e-23	2.48345e-21
CLMP	648.786	1.51496	0.133398	11.3567	6.87285e-30	2.13551e-27
GFRA2	248.287	1.51503	0.228949	6.61734	3.65731e-11	7.50044e-10
PLN	124.838	1.51752	0.206513	7.34829	2.00765e-13	5.79019e-12
PRDM16	161.079	1.51871	0.220556	6.88582	5.74559e-12	1.32149e-10
MMP1	520.206	1.52143	0.239453	6.35376	2.10109e-10	3.79811e-09
ITGA11	2487.75	1.52661	0.165203	9.2408	2.44655e-20	1.73663e-18
CACNA1C	384.836	1.52681	0.120784	12.6408	1.25764e-36	2.95869e-33
SCG3	34.9733	1.53236	0.226451	6.76684	1.31625e-11	2.88629e-10
MOXD1	564.612	1.53291	0.161171	9.51111	1.88641e-21	1.58497e-19
DPYSL5	224.923	1.53393	0.315041	4.869	1.12164e-06	1.0149e-05
BMP2	127.327	1.5355	0.149655	10.2603	1.06413e-24	1.348e-22
RFLNA	404.925	1.53736	0.142693	10.7739	4.57166e-27	9.07061e-25
MMP2	17678.4	1.54256	0.131225	11.7551	6.65025e-32	3.42238e-29
SCARNA5	46.6848	1.54409	0.220273	7.00988	2.38531e-12	5.81945e-11
ZFHX4	395.45	1.54507	0.156528	9.87088	5.56736e-23	5.62474e-21
TPSAB1	177.436	1.54721	0.229769	6.73375	1.65348e-11	3.57343e-10
ASPA	23.2606	1.54906	0.165395	9.36586	7.54356e-21	5.80502e-19
CCL18	300.551	1.55026	0.234608	6.60787	3.89886e-11	7.93652e-10
FAT3	97.0211	1.55551	0.207005	7.51438	5.71798e-14	1.79702e-12
RBFOX3	32.7952	1.55602	0.21048	7.39271	1.43871e-13	4.21577e-12
SHISAL1	187.543	1.56143	0.18356	8.5064	1.79413e-17	8.71558e-16
GALNT5	222.838	1.56245	0.149894	10.4237	1.93226e-25	2.84111e-23
ADAMTS2	1866.15	1.5632	0.146294	10.6854	1.19175e-26	2.13323e-24
SEMA6A	1003.3	1.56492	0.142641	10.9711	5.26554e-28	1.20435e-25
MYT1	170.993	1.56517	0.197055	7.94285	1.97594e-15	7.44617e-14
VGLL3	459.618	1.56552	0.15591	10.0411	1.005e-23	1.12587e-21
KCNE4	329.355	1.56744	0.145695	10.7584	5.41265e-27	1.04865e-24
ALPK2	144.231	1.57825	0.19686	8.01709	1.08283e-15	4.22561e-14
TMEM151A	111.687	1.58395	0.226975	6.97853	2.98291e-12	7.12954e-11
MFAP5	2904.28	1.59817	0.186917	8.55017	1.22903e-17	6.11469e-16
PIEZO2	278.793	1.60301	0.15669	10.2304	1.44854e-24	1.80716e-22
ACTG2	1230.86	1.60459	0.174527	9.19392	3.78774e-20	2.63192e-18
GAP43	39.9467	1.60615	0.198632	8.08609	6.16131e-16	2.48079e-14
CXCL12	4329.81	1.60905	0.149746	10.7452	6.24518e-27	1.18213e-24
CLEC2L	141.024	1.60918	0.301394	5.33915	9.33851e-08	1.04974e-06
MSC	403.038	1.61244	0.155664	10.3585	3.82918e-25	5.38966e-23
AEBP1	22771.5	1.61774	0.133162	12.1487	5.82673e-34	5.05025e-31
ARSI	140.848	1.62537	0.14679	11.0728	1.69988e-28	4.05704e-26
COL2A1	653.762	1.62563	0.279287	5.82065	5.86208e-09	8.20193e-08
EBF2	48.0001	1.62703	0.183151	8.88357	6.47492e-19	3.75454e-17
FREM2	177.749	1.64082	0.238739	6.87288	6.29205e-12	1.43913e-10
TMEM59L	161.033	1.64658	0.195121	8.43879	3.20633e-17	1.50433e-15
HAND2	144.832	1.65227	0.157565	10.4863	9.98399e-26	1.5366e-23
SYT8	360.738	1.65238	0.228696	7.22524	5.00207e-13	1.3729e-11
SERPINE1	4919.97	1.65279	0.174406	9.47663	2.62617e-21	2.15163e-19
PAX2	2738.45	1.65299	0.344248	4.80173	1.57303e-06	1.37717e-05
HAND2-AS1	44.1139	1.65315	0.157445	10.4999	8.64953e-26	1.35658e-23
FBN1	3597.7	1.65836	0.137753	12.0387	2.22548e-33	1.59345e-30
SFRP4	4247.16	1.65956	0.182932	9.07197	1.16881e-19	7.50117e-18
TENM3	717.348	1.66296	0.19822	8.38948	4.88313e-17	2.2153e-15
GREM1	568.411	1.67056	0.214972	7.77108	7.78185e-15	2.68662e-13
RANBP3L	59.4896	1.67218	0.157332	10.6284	2.19851e-26	3.81105e-24
PTPRT	501.458	1.67365	0.304348	5.49912	3.81697e-08	4.62531e-07
MEIS3	476.795	1.6741	0.141201	11.8561	1.99987e-32	1.17621e-29
COL1A1	320753	1.6766	0.147354	11.3781	5.37849e-30	1.73672e-27
SCRG1	22.1178	1.67794	0.195605	8.57819	9.63796e-18	4.91387e-16
FN1	100919	1.67946	0.156893	10.7045	9.69534e-27	1.77403e-24
ADAMTS12	1266.31	1.68193	0.147963	11.3672	6.09127e-30	1.92906e-27
CDK15	56.6556	1.68346	0.149843	11.2349	2.74912e-29	7.42173e-27
KIF26B	1665.35	1.68531	0.149382	11.2819	1.61286e-29	4.57941e-27
PTGFR	42.7285	1.68903	0.2259	7.47687	7.61119e-14	2.34282e-12
C5orf46	68.672	1.69314	0.236357	7.16349	7.86508e-13	2.08235e-11
ASXL3	112.773	1.70376	0.202724	8.40434	4.30264e-17	1.97922e-15
LRRC17	493.313	1.70389	0.152782	11.1524	6.9673e-29	1.75294e-26
HAS1	62.737	1.70434	0.236204	7.21555	5.37173e-13	1.4646e-11
ISM1	655.063	1.71097	0.143713	11.9054	1.10882e-32	7.30401e-30
FGF7	271.682	1.71255	0.190528	8.98846	2.50721e-19	1.55221e-17
RFX8	39.6634	1.71322	0.164964	10.3854	2.88892e-25	4.17322e-23
LIX1	1723.09	1.72749	0.236645	7.29992	2.87939e-13	8.14739e-12
C1QTNF3	808.258	1.73117	0.142343	12.162	4.95458e-34	4.53289e-31
ST6GAL2	603.243	1.73126	0.172157	10.0563	8.6177e-24	9.8553e-22
MFAP4	4090.67	1.73604	0.177975	9.75441	1.76621e-22	1.68126e-20
ADAM12	1868.42	1.73956	0.166033	10.4772	1.09959e-25	1.66129e-23
CYP26B1	282.203	1.7403	0.17163	10.1399	3.67646e-24	4.41926e-22
CTSK	3931.47	1.74305	0.164774	10.5784	3.75179e-26	6.17845e-24
FBN2	1334.1	1.74385	0.198646	8.7787	1.65378e-18	9.16984e-17
NTM	467.092	1.76667	0.212454	8.31557	9.13094e-17	4.05306e-15
PPEF1	44.0989	1.77041	0.179506	9.8627	6.04012e-23	6.06516e-21
UBE2QL1	151.114	1.77063	0.175038	10.1157	4.70685e-24	5.5366e-22
FGF17	186.906	1.77444	0.265063	6.69442	2.16536e-11	4.59524e-10
THBS2	8027.81	1.77854	0.169055	10.5205	6.9509e-26	1.10065e-23
SEMA3D	300.99	1.78268	0.178687	9.97653	1.93108e-23	2.10603e-21
MMP11	11888.3	1.78282	0.199206	8.9496	3.56766e-19	2.16001e-17
COL5A2	8467.72	1.7837	0.151669	11.7605	6.23695e-32	3.31323e-29
COL8A1	3965.33	1.79531	0.158302	11.341	8.21548e-30	2.50542e-27
MEGF10	155.483	1.80224	0.222621	8.09556	5.70021e-16	2.3351e-14
VCAN	6817.47	1.80493	0.149712	12.056	1.80289e-33	1.4728e-30
DIO2	315.5	1.81508	0.220711	8.22376	1.97219e-16	8.56938e-15
COL3A1	102210	1.81741	0.153449	11.8437	2.32028e-32	1.3176e-29
POSTN	5920.05	1.82272	0.224597	8.11552	4.83689e-16	2.00136e-14
SLC7A10	95.119	1.82321	0.226901	8.03527	9.33744e-16	3.67868e-14
TMEM72	47.0996	1.82698	0.256952	7.11018	1.15889e-12	2.98196e-11
CALB1	152.52	1.82839	0.264648	6.90876	4.88915e-12	1.13561e-10
SLC16A12	47.0997	1.83028	0.244905	7.47343	7.81314e-14	2.39603e-12
NGFR	495.799	1.83189	0.205861	8.89865	5.65323e-19	3.31147e-17
BRINP1	87.2593	1.83335	0.223893	8.18852	2.64463e-16	1.13416e-14
COL10A1	2224.43	1.83786	0.201987	9.0989	9.12548e-20	6.01114e-18
SLC14A2	37.0613	1.84518	0.233125	7.91496	2.47338e-15	9.17381e-14
SHISA2	223.967	1.84974	0.174282	10.6134	2.5806e-26	4.4268e-24
LUM	16144.3	1.8517	0.193623	9.56341	1.13939e-21	9.87551e-20
IGLON5	550.569	1.86754	0.234987	7.94744	1.90411e-15	7.20849e-14
FAP	802.873	1.86865	0.189103	9.88167	4.99926e-23	5.08196e-21
CRISPLD2	2459.88	1.8688	0.138566	13.4867	1.87321e-41	1.5424e-37
COL26A1	998.947	1.87235	0.191725	9.76578	1.57889e-22	1.5117e-20
AGTR1	58.1777	1.8814	0.172468	10.9087	1.04766e-27	2.30038e-25
COL5A1	21930.3	1.88339	0.15448	12.1918	3.43762e-34	3.53817e-31
TMEM151B	31.5445	1.8848	0.193679	9.73152	2.21268e-22	2.08219e-20
PHF21B	57.8699	1.88487	0.254982	7.39217	1.4445e-13	4.22523e-12
CACNA1G	241.564	1.88545	0.164282	11.4769	1.72346e-30	6.03869e-28
TIMP3	1028.63	1.90141	0.14693	12.9409	2.64461e-38	1.08878e-34
CIDEC	40.4714	1.91204	0.245446	7.79007	6.69702e-15	2.33164e-13
INHBA	1833.87	1.91304	0.182571	10.4783	1.08634e-25	1.65647e-23
UPK2	310.039	1.92034	0.220445	8.71116	3.00769e-18	1.61338e-16
SEZ6L	47.4935	1.92097	0.251311	7.64382	2.10876e-14	7.00213e-13
NKD2	820.852	1.92271	0.144439	13.3116	1.98298e-40	1.08852e-36
CDH16	306.667	1.92303	0.300732	6.39447	1.61103e-10	2.95111e-09
ITGBL1	183.465	1.92597	0.198772	9.68936	3.34609e-22	3.11319e-20
SVEP1	701.713	1.92658	0.167294	11.5161	1.09405e-30	4.14549e-28
IGF2	194474	1.93176	0.27653	6.98571	2.83418e-12	6.81363e-11
EFNA2	74.4556	1.94507	0.255849	7.60241	2.90675e-14	9.47888e-13
GSG1L	30.9179	1.95292	0.211599	9.22936	2.72253e-20	1.91601e-18
COMP	3818.12	1.9681	0.229152	8.58861	8.80269e-18	4.51597e-16
MAGEL2	155.341	1.97932	0.177148	11.1733	5.51193e-29	1.4408e-26
CPA3	61.0979	1.98156	0.213857	9.26584	1.93542e-20	1.39181e-18
PRRX1	1900.08	2.00156	0.168438	11.8831	1.44933e-32	8.83983e-30
SLIT1	127.425	2.00576	0.194594	10.3074	6.52616e-25	8.80925e-23
SIX3	381.254	2.01902	0.332454	6.07308	1.25479e-09	1.98119e-08
SPOCK1	750.58	2.01908	0.178101	11.3367	8.63468e-30	2.53921e-27
CXCL14	2049.62	2.03027	0.203405	9.98139	1.83875e-23	2.0187e-21
ADAMTS16	318.114	2.06731	0.199649	10.3547	3.98274e-25	5.55828e-23
SFRP5	181.588	2.06893	0.228713	9.04593	1.4839e-19	9.32707e-18
XPNPEP2	30.1408	2.08506	0.185151	11.2615	2.03378e-29	5.58204e-27
PLIN1	205.831	2.10277	0.215887	9.74016	2.03237e-22	1.92351e-20
ELAVL3	38.2607	2.12244	0.234982	9.03235	1.68023e-19	1.0521e-17
COL9A3	782.599	2.13915	0.223705	9.56237	1.1509e-21	9.92304e-20
IGFN1	64.4824	2.16698	0.270785	8.00257	1.21852e-15	4.74389e-14
NKAIN4	368.659	2.17592	0.249265	8.72936	2.56116e-18	1.38286e-16
DPT	170.508	2.20254	0.2051	10.7388	6.68772e-27	1.25152e-24
AJAP1	936.09	2.21807	0.255445	8.68317	3.849e-18	2.04469e-16
CYP26A1	72.1412	2.23726	0.17414	12.8475	8.88481e-38	2.43942e-34
ASPN	471.874	2.24186	0.191885	11.6833	1.55087e-31	7.29709e-29
COL11A1	3989.98	2.27191	0.221362	10.2633	1.03101e-24	1.31935e-22
HOXA9	153.146	2.3014	0.26295	8.75225	2.09134e-18	1.14419e-16
NKX3-2	112.952	2.33011	0.193743	12.0268	2.56884e-33	1.76265e-30
LRRC15	1345.46	2.34804	0.239047	9.82253	9.00538e-23	8.93377e-21
LINC00982	61.562	2.36939	0.26174	9.05245	1.39792e-19	8.82031e-18
ELFN2	94.2711	2.44637	0.19942	12.2674	1.35549e-34	1.59444e-31
PRG4	203.329	2.44748	0.215886	11.3369	8.61237e-30	2.53921e-27
IGF2BP1	291.027	2.46187	0.249954	9.8493	6.90212e-23	6.88874e-21
GFRA1	412.924	2.47243	0.205173	12.0505	1.92787e-33	1.4728e-30
OMD	228.554	2.49749	0.218337	11.4387	2.67951e-30	9.00534e-28
CYP2W1	195.042	2.52974	0.237159	10.6669	1.45461e-26	2.54835e-24
SOX11	979.903	2.6354	0.273114	9.64944	4.9423e-22	4.49667e-20
EPYC	924.401	2.64067	0.276119	9.56351	1.13827e-21	9.87551e-20
SFRP2	5766.71	2.81612	0.241916	11.6409	2.55307e-31	1.08134e-28
BARX1	180.223	2.83201	0.229487	12.3406	5.47441e-35	6.93482e-32
ADH1B	505.734	2.88866	0.274118	10.538	5.77013e-26	9.22549e-24
CUX2	124.844	2.96726	0.251562	11.7954	4.1243e-32	2.26396e-29
IGDCC3	146.832	3.01477	0.246643	12.2232	2.3368e-34	2.56549e-31
FABP4	387.79	3.52669	0.30124	11.7072	1.17021e-31	5.66796e-29
