# Supplementary material for: Landscape of Metabolite-Protein Interaction Networks Reveals Prognostic Subtypes of Ovarian Cancer
Source: Research Square preprint supplement (doi:10.21203/rs.3.rs-3235226/v1), 2023-08-10
Supplement: Supplementary file 3 [file 22594a916b8522030607dffa.xlsx]

## Sheet: Table S3
protein1	protein2
M6PR	PIGR
COL11A1	ITGA3
MGST1	ADH1B
DCN	DPT
ASPN	DCN
VAMP3	NTS
NTS	UTS2
UTS2	IGF2BP1
STYK1	OVGP1
IGF2BP1	APPBP2
BCAR1	GFRA1
GOLGA5	CUX2
IL4R	IL5RA
CYP26A1	RDH8
NTS	P2RY10
NTS	NGFR
SCT	NTS
HMGCS2	OXCT1
COL11A1	ITGB4
HOXA9	TRIP6
NTS	APOH
IGF2BP1	APOH
CYP26A1	ADH7
CYP26A1	ADH1A
ADH1A	ADH1B
GSTA3	ADH1B
SIRT1	SFRP2
STX1B	NTS
TECR	NTS
DNAL4	DNAH12
MYH9	OVGP1
GSTZ1	ADH1B
NTS	BDKRB1
NFKBIA	HOXA9
CSNK2A1	CUX2
NTS	PROKR2
NTS	PDYN
NTS	OXT
NTS	MLNR
ZNF500	ELFN2
SFRP1	BARX1
HOXA9	PAF1
PIGR	FCGRT
TGFB1	FABP4
TGFB1	DPT
TGFB1	OMD
CD79A	PIGR
SLC5A5	NTS
NTS	PIK3R2
NTS	COMP
COMP	COL11A1
CYP3A43	CYP26A1
HGF	GFRA1
WNT16	SFRP2
NTS	TFPI2
COL11A1	ITGB8
NTS	MPP6
CYP3A5	CYP26A1
VIM	IGDCC3
RARS	CYP26A1
CYP26A1	RBP2
CYP26A1	RBP1
CYP26A1	RDH10
CYP26A1	ALDH1A2
CYP26A1	UGT2A3
CYP26A1	ACTN4
RARA	CYP26A1
CYP26A1	SULF1
CYP26A1	CYP2C9
CYP26A1	MSMO1
CYP26A1	SC5DL
CYP26A1	UGT2B10
CYP26A1	ADH4
CYP26A1	SQLE
CYP26A1	RDH12
CYP26A1	STRA8
CYP26A1	IFNA1
CYP26A1	CYP2C18
CYP26A1	UGT2A1
CYP26A1	RETSAT
ADH5	CYP26A1
CYP26A1	ALDH1A1
CYP26A1	CYP2A6
CYP26A1	SYNPO
CYP26A1	SCEL
CYP26A1	UGT1A6
CYP26A1	UGT2B7
CYP26A1	UGT1A1
CYP26A1	UGT2B4
CYP26A1	IL8
CYP26A1	ADH1B
CYP26A1	CYP4A11
CYP26A1	DHRS9
CYP26A1	UGT2B17
CYP26A1	CYP2B6
CYP26A1	DHRS4
CYP26A1	TGIF1
CYP26A1	DGAT1
CYP26A1	CYP2A13
CYP26A1	LRAT
CYP26A1	CYP3A7
CYP26A1	CYP3A4
CYP26A1	UGT2B15
CYP26A1	CYP1A2
CYP26A1	UGT1A10
CYP26A1	UGT1A9
LSS	CYP26A1
CYP26A1	XAB2
CYP26A1	CRABP2
CYP26A1	CYP2C8
CYP26A1	CYP2C19
CYP26A1	CYP4A22
CYP26A1	UGT1A4
CYP26A1	UGT1A5
CYP26A1	UGT1A7
CYP26A1	UGT1A8
CYP26A1	DHRS3
CYP26A1	NPHS1
CYP26A1	CYP1A1
CYP26A1	PNPLA4
CYP26A1	RDH11
CYP26A1	ADH6
CYP26A1	RDH16
CYP26A1	UGT1A3
ACTA2	ASPN
AATF	NTS
WNT3	SFRP2
FABP4	MED31
ALDH3A1	ADH1B
COL1A1	COL11A1
ASPN	COL1A1
NTS	PPY
NTS	AFP
AFP	IGF2BP1
AFP	IGDCC3
NTS	GNRHR
OMD	ST3GAL4
CCND1	HOXA9
DGAT2	FABP4
HMGCS2	MVK
MGP	NTS
FZD10	SFRP2
PIGR	IFNG
ENO2	NTS
NANOG	NTS
NANOG	IGF2BP1
NTS	STK38
NTS	MEP1A
NTS	SLC6A7
GHR	OVGP1
LOX	DPT
PIGR	IL4
IL4	DPT
IL5	IL5RA
HMGCS2	EHHADH
APOB	NTS
APOB	IGF2BP1
COL11A1	KCNJ13
WNT6	SFRP2
NTS	KISS1R
ENO1	NTS
NTS	RGS2
APOA1	NTS
HOXA9	FCRLA
GHRH	NTS
GHRH	OVGP1
TGFB3	DPT
ASPN	TGFB3
NTS	GPR68
FZD3	SFRP2
DNAH12	DYNLL2
NTS	MND1
NTS	NAA50
NTS	GHSR
CPXM2	ASPN
GSTM2	ADH1B
FLT3	HOXA9
AHR	DPT
NPY	NTS
HOXA7	HOXA9
DNAI1	DNAH12
DYNLL1	DNAH12
COL11A1	COL10A1
ASPN	COL10A1
OVGP1	GPR83
NTS	CTCFL
IGF2BP1	CTCFL
NTS	MAGEA10
IGF2BP1	MAGEA10
LIPE	FABP4
COL11A1	COL21A1
IL5RA	SOX4
GOT2	FABP4
NTS	NIN
BMP4	BARX1
GFRA1	PSPN
NTS	GNRH2
NTS	FFAR2
NTS	FFAR1
IL5RA	ARL2
STATH	OVGP1
NTS	F2RL3
VIL1	OVGP1
NTS	MCHR1
SNAP23	NTS
ALDH1A2	ADH1B
ISLR	ASPN
NTS	NALCN
UGT2A3	ADH1B
SNX4	DNAH12
FABP4	MED17
NTS	ACE2
MLLT1	HOXA9
NTS	PGPEP1
CYP2E1	ADH1B
NTS	HBZ
NR1H2	NTS
ACLY	HMGCS2
TMEM204	ASPN
SFRP2	BARX1
FGF8	BARX1
BARX1	NOG
BARX1	PAX9
NTS	LIN28A
IGF2BP1	LIN28A
SDC1	COL11A1
ALDH3B2	ADH1B
NTS	NMUR2
CHRM3	NTS
FABP4	MED10
SORT1	NTS
NTS	FST
NTS	GRP
NTS	ANXA1
NTS	NT5E
NTS	NMBR
NTS	HTR2B
NTS	IGF2BP3
NTS	HEMGN
SORL1	NTS
NTS	PLCB2
NTS	TRIM37
NTS	PIK3R3
NTS	ELL
NTS	GNA15
ICK	NTS
NTS	CDC45
TYR	NTS
EED	NTS
VAMP8	NTS
PIK3CA	NTS
NTS	NMU
POMC	NTS
NTS	KNG1
NTS	AMBP
NTS	GAL
NTS	IDE
NTS	MLN
ETV6	NTS
NTS	LUM
NTS	NPFF
NTS	ITGB7
NTS	GPR65
NTS	MEP1B
NTS	ARRB2
SH3GL1	NTS
NTS	PROK1
NTS	GPR17
NTS	AGTR1
FTH1	NTS
NTS	PIK3R1
NTS	MUT
IGFBP1	NTS
NTS	HTR2C
NTS	GNRH1
NTS	CRH
NTS	NPFFR1
NTS	PLCB3
MRPL49	NTS
NTS	MCHR2
NTS	CYSLTR2
NTS	MBNL1
NTS	CENPH
NTS	APP
NTS	VAMP7
SST	NTS
NTS	IGF2BP1
NTS	PTGER1
HBE1	NTS
NTS	HCRT
NTS	RHCE
NTS	CCKAR
NTS	PROK2
ALB	NTS
NTS	CASR
NTS	F2RL2
NTS	F2RL1
NTS	COL14A1
NTS	AVPR1A
NTS	TAC3
NTF4	NTS
NTS	HRASLS5
NTS	PBK
NTS	PTAFR
NTS	MAEA
NTS	TACR3
NTS	TRH
NTS	PAH
NTS	TACR1
NTS	NTSR2
NTS	PROKR1
NTS	GTSF1
NTS	THOP1
NTS	P2RY1
NTS	NMUR1
FOS	NTS
FGA	NTS
NTS	CHRM1
NTS	IL8
NTS	ADRA1B
NTS	LTB4R
NTS	NPTX1
NTS	BDKRB2
NTS	NPFFR2
NTS	F2
PLG	NTS
NTS	GPRC6A
NTS	P2RY6
NTS	TRHR
HRAS	NTS
NTS	P2RY2
NTS	XCR1
NAGPA	NTS
NTS	ADRBK1
HADH	NTS
LEP	NTS
EDNRA	NTS
ASPRV1	NTS
STX4	NTS
NTS	GPR4
NTS	TAC1
NTS	F2R
NTS	UTS2R
NTS	PENK
NTS	OXTR
NTS	KNTC1
NTS	DNMT3B
NTS	GPR132
NTS	GAST
NTS	GDF3
NTS	CALCA
NTS	PMCH
NTS	SULT4A1
NTS	RGS19
NTS	INTU
NTS	PLCB4
NTS	GNG2
NTS	DPPA4
EDNRB	NTS
NTS	CCKBR
NTS	ARHGEF25
NTS	QRFPR
NTS	CCK
NTS	EDN3
CIDEB	NTS
RAB27A	NTS
AVPR2	NTS
NTS	PLCB1
NTS	STX3
NTS	FPR2
NTS	UTS2D
NTS	STX2
NTS	LPAR6
NTS	QRFP
NTS	SON
INS-IGF2	NTS
NTS	MAGEA1
NTS	GIP
NTS	DSCR8
NTS	MAGEA12
NTS	CTSE
TES	NTS
NTS	LPAR1
NTS	SPTSSB
ELF3	NTS
NTS	NPSR1
NTS	PYY
NTS	MME
NTS	PMEL
OPN3	NTS
NTS	AVPR1B
NTS	KISS1
NTS	VIP
NTS	RGS18
NTS	UST
NTS	PLA2G4A
NTS	APOA2
NTS	SPTA1
MCL1	NTS
NTS	PREP
NGF	NTS
NTS	CGA
NTS	NTSR1
NTS	SPANXE
NTS	LPAR3
NTS	PTGFR
GPC3	NTS
NTS	RHAG
JUN	NTS
NTS	RHOXF2
NTS	OPN4
MMP9	NTS
NTS	MPL
NTS	EDN2
NTS	LPAR4
NTS	CYSLTR1
NTS	TACR2
NTS	HCRTR1
NTS	TBXA2R
NTS	GNA14
NTS	NMS
NTS	NDP
NTS	HTR2A
MCM8	NTS
EDN1	NTS
NTS	ADRA1D
NTS	IFNB1
NTS	GRPR
EMILIN1	NTS
NTS	NLN
TH	NTS
NTS	TYRP1
NTS	URI1
NTS	GRK5
NTS	NPS
NTS	DSCAM
NTS	GCGR
NTS	HMGA2
NTS	LPAR2
NTS	CPE
GCG	NTS
NTS	UNC80
DCT	NTS
NTS	AHSG
NTS	OPRM1
RAN	NTS
CPS1	NTS
POU5F1	NTS
BDNF	NTS
NTS	L1TD1
FABP4	MED6
CDK4	FABP4
USP15	FABP4
FABP4	MED4
FABP4	TGS1
FABP4	SMARCD3
FABP4	CREBBP
PPARA	FABP4
UCP1	FABP4
FABP4	MED15
FABP4	EP300
FABP4	MED26
PPARGC1A	FABP4
FABP4	MGLL
FABP4	MED20
FABP4	MED9
FABP4	ACP1
FABP4	MED13L
MED21	FABP4
FABP4	MED7
PPARG	FABP4
FABP4	MED8
FABP4	MED27
WNT1	FABP4
FABP4	MED11
FABP4	FABP1
FABP4	MED30
PLIN1	FABP4
FABP4	WNT10B
FABP4	ANGPTL4
FABP4	HDAC3
INSR	FABP4
FASN	FABP4
FABP4	CEBPB
FOS	FABP4
CD36	FABP4
LPL	FABP4
LEP	FABP4
FABP4	MED29
FABP4	PCK1
FABP4	ADIPOQ
NCOA1	FABP4
FABP4	EBF1
FABP4	MED14
FABP4	MED16
FABP4	CARM1
FABP4	CFD
FABP4	MED19
FABP4	MED22
EXT2	FABP4
FABP4	ELOVL2
FABP4	NCOR2
FABP4	MED24
INS-IGF2	FABP4
FABP4	NCOA6
FABP4	MED23
FABP4	CDK19
FABP4	CCNC
JUN	FABP4
NCOA3	FABP4
FABP4	SNCG
FABP4	CCND3
FABP4	MED18
FABP4	MED12
FABP4	PINK1
FABP4	CDK8
TNK2	FABP4
FABP4	MED13
FABP4	CHD9
NCOA2	FABP4
TBL1XR1	FABP4
RXRA	FABP4
LYVE1	OVGP1
IL5RA	SDCBP
PIK3CA	IL5RA
CBL	IL5RA
IL5RA	CBLB
IL5RA	TYK2
IL5RA	CBLC
IL5RA	PIK3R1
IL3	IL5RA
CSF2	IL5RA
IL5RA	SOCS5
IL5RA	SOCS1
IL5RA	SOCS3
IL5RA	SOCS7
IL5RA	UNC119
GRB2	IL5RA
IL5RA	SOCS2
PTPN11	IL5RA
IL5RA	SOCS4
IL5RA	JAK1
CCR3	IL5RA
IL5RA	TPPP
IL5RA	IL6R
JAK2	IL5RA
IL5RA	CSF2RB
PTPN6	IL5RA
JAK3	IL5RA
GSTM5	ADH1B
GSTM3	ADH1B
COL11A1	ITGA7
USP15	LRRC15
BCMO1	ADH1B
DYNC1LI2	DNAH12
SFRP2	WNT10A
IGF2BP3	IGF2BP1
IGF2BP1	HEMGN
HMGCS2	TGS1
DYNC2LI1	DNAH12
SIX3	NKX3-2
ITGAV	COL11A1
COL11A1	COL8A1
DNAH12	DNAH3
CUX2	CCDC63
TSPEAR	CUX2
HTR4	CUX2
CUX2	FAM109A
FMO3	CUX2
AR	CUX2
ERG	CUX2
SLC4A4	CUX2
ABCA13	CUX2
ALDH2	ADH1B
ALDH2	DPT
CDH1	AJAP1
COL11A1	CILP
DPT	CILP
ASPN	CILP
HOXA9	SMAD2
HMGCS2	SMARCD3
CREBBP	HOXA9
HMGCS2	CREBBP
ITGA2B	COL11A1
DNAH9	DNAH12
ASPN	OGN
OGN	OMD
GFRA1	DOK5
PPARA	HMGCS2
OMD	ST3GAL3
CDC45	IGF2BP1
TYR	IGF2BP1
TYR	IGDCC3
TYR	AJAP1
PIK3CA	GFRA1
WNT5A	SFRP2
ITGA9	COL11A1
COL11A1	COL5A3
TF	PIGR
DNAH5	DNAH12
AMBP	IGF2BP1
UGT2B10	ADH1B
WNT2	SFRP2
MGST2	ADH1B
PRKAR2A	AKAP14
CPT1A	HMGCS2
HOXA9	KAT6A
PRKAR2B	AKAP14
CDK6	CDC20B
HMGCS2	ACAT1
TAPBPL	IGDCC3
ASPN	LUM
LUM	OMD
OMD	KERA
ITGB7	COL11A1
IGF1R	HOXA9
COL11A1	CDH11
ASPN	CDH11
ASGR1	IGF2BP1
HOXA9	CBX8
ELFN2	ZFP14
PIGR	FCGR2A
PIGR	FCRL4
CTSK	COL11A1
ASPN	CTSK
WNT9A	SFRP2
CALM2	PIGR
MEIS1	HOXA9
DYNC1LI1	DNAH12
SFRP2	WNT3A
SFRP2	WNT7A
SFRP2	DKK2
SFRP2	FZD7
SFRP2	WIF1
SFRP2	FZD1
SFRP2	WNT9B
SFRP2	WNT4
WNT1	SFRP2
LRP5	SFRP2
SHH	SFRP2
SFRP2	WNT10B
BMP1	SFRP2
SFRP2	WNT5B
SFRP2	DKK3
SFRP2	FZD2
WNT11	SFRP2
SFRP2	KRTAP11-1
SFRP2	WNT8B
SFRP2	WNT7B
CTNNB1	SFRP2
SFRP2	FZD9
SFRP2	FZD6
FZD5	SFRP2
SFRP2	PAX2
SFRP2	WNT2B
DKK1	SFRP2
FZD8	SFRP2
SFRP2	PAX6
SFRP2	HR
SFRP2	WNT8A
SFRP4	SFRP2
PIK3R1	GFRA1
RASA1	GFRA1
CYP39A1	CYP2W1
IGFBP1	IGF2BP1
IGFBP1	AJAP1
AKAP14	CPXCR1
NOTCH1	SPDEF
CD44	IGF2BP1
CD44	COL11A1
HMGCS2	DLAT
EIF4E	HOXA9
IGF2BP1	KHDRBS2
BICD1	DNAH12
IGFN1	GADL1
COL11A1	ITGA1
CENPH	IGF2BP1
IGF2BP1	HNRNPU
COL11A1	ITGB6
PLEKHG4B	ELFN2
HOXA10	HOXA9
MSI2	HOXA9
PRKCA	GFRA1
GSTA5	ADH1B
HMGCS2	ACAA2
C1orf112	C1orf194
UGT2A1	ADH1B
OMD	B3GNT7
HMGCR	HMGCS2
NCK1	GFRA1
NBL1	C1orf194
COL11A1	CELA3A
HBE1	IGF2BP1
RHCE	IGF2BP1
IGF2BP1	CDT1
IGF2BP1	GTSF1
RPAP1	IGF2BP1
F2	IGF2BP1
IGF2BP1	MEPCE
IGF2BP1	DNMT3B
IGF2BP1	GDF3
IGF2BP1	IGDCC3
IGF2BP1	DPPA4
IGF2	IGF2BP1
GRB2	IGF2BP1
HNRNPA1	IGF2BP1
CTNNB1	IGF2BP1
UBC	IGF2BP1
IGF2BP1	MAGEA1
ACTB	IGF2BP1
IGF2BP1	MOV10
IGF2BP1	DSCR8
IGF2BP1	MAGEA12
SRC	IGF2BP1
IGF2BP1	SPTSSB
DHX9	IGF2BP1
SERPINC1	IGF2BP1
APOA2	IGF2BP1
IGF2BP1	SPTA1
FYN	IGF2BP1
TCF7L2	IGF2BP1
SYNCRIP	IGF2BP1
IGF2BP1	BTRC
ABCC2	IGF2BP1
IGF2BP1	SPANXE
RHAG	IGF2BP1
RHOXF2	IGF2BP1
IGF2BP1	YBX1
IGF2BP1	CDK9
MYC	IGF2BP1
NOP56	IGF2BP1
IGF2BP1	DSCAM
HMGA2	IGF2BP1
DCT	IGF2BP1
AHSG	IGF2BP1
POU5F1	IGF2BP1
BDNF	IGF2BP1
ITIH3	IGF2BP1
IGF2BP1	L1TD1
GSTT2B	ADH1B
CALM3	PIGR
HOXA9	PKNOX1
HBE1	AKAP14
COX7A1	DPT
COX7A1	ASPN
PIGR	CCL5
COL11A1	ITGA5
COL11A1	ZYG11B
FRZB	ASPN
COL11A1	COL6A3
ASPN	HDAC11
RETSAT	ADH1B
DNALI1	DNAH12
DYNLRB2	DNAH12
DNAI2	DNAH12
USP36	DNAH12
DNAH7	DNAH12
DYNC1I1	DNAH12
DYNC1H1	DNAH12
DYNLRB1	DNAH12
DNAH8	DNAH12
DCTN1	DNAH12
TCTE3	DNAH12
DYNLT1	DNAH12
DYNLT3	DNAH12
DNAH2	DNAH12
DNAH6	DNAH12
DNAH12	DNAH17
DYNC1I2	DNAH12
DYNC2H1	DNAH12
DNAH10	DNAH12
DNAH1	DNAH12
DCTN2	DNAH12
DNAH12	DNAH14
ITGB5	COL11A1
ASPN	GUCY1A3
COL11A1	ITGA2
ITGA2	OVGP1
CDC25A	CDC20B
HSPA9	OVGP1
ASPN	FNDC1
COL1A2	COL11A1
COL1A2	ASPN
COX6C	DPT
IL13	C9orf24
FOXJ1	C9orf24
ALDH1A1	ADH1B
COL14A1	COL11A1
CXorf22	AKAP14
COL11A1	LRRC18
FRS2	GFRA1
LEO1	HOXA9
PPIB	AJAP1
ELFN2	ZBTB39
PIGR	STAT6
STAT6	SPDEF
ELFN2	PWWP2A
C2CD4C	ELFN2
ELFN2	ZNF606
ELFN2	ZNF594
MS4A7	ASPN
COL11A1	COL6A2
CRK	GFRA1
LOXHD1	NKAIN4
HMGCS2	MVD
OVGP1	LAIR2
BIRC5	SPDEF
GFRA1	NRTN
IGF1	OVGP1
DYNLRB2	FAM183A
COL11A1	COL22A1
UGT1A6	ADH1B
BCR	HOXA9
COL3A1	COL11A1
COL3A1	OVGP1
COL3A1	ASPN
FASN	HMGCS2
CTNNA1	GFRA1
AKAP14	SPACA5B
UGT2B7	ADH1B
UGT1A1	ADH1B
IRS1	GFRA1
UGT2B4	ADH1B
OMD	B3GNT2
SMAD1	NKX3-2
AKAP14	SPACA5
COL8A2	COL11A1
GSTM1	ADH1B
UGT2B17	ADH1B
CYP2B6	ADH1B
ALDH1A3	ADH1B
DGAT1	ADH1B
CYP2F1	ADH1B
GSTA1	ADH1B
LRAT	ADH1B
ADH1B	MAOA
UGT2B15	ADH1B
UGT1A10	ADH1B
GSTO2	ADH1B
ADH1B	ALDH3A2
UGT1A9	ADH1B
ADH1B	ALDH9A1
ADH1B	COMT
ADH1B	MGST3
GSTO1	ADH1B
ADH1B	GSTM4
GSTA4	ADH1B
UGT1A4	ADH1B
UGT1A5	ADH1B
UGT1A7	ADH1B
UGT1A8	ADH1B
ALDH1B1	ADH1B
ADH1B	MAOB
ADH1B	PNPLA4
GSTP1	ADH1B
ADH1B	ALDH7A1
GSTT1	ADH1B
UGT1A3	ADH1B
GSTA2	ADH1B
OVGP1	AVEN
SDC2	COL11A1
BPTF	HOXA9
HMGCS2	SUCLG2
ASPN	MXRA8
OMD	CHST2
F2	IGDCC3
COL11A1	GP6
GP6	OVGP1
CHST1	OMD
HOXA9	HOXB9
PRKACA	AKAP14
HRAS	GFRA1
COL11A1	APOBEC4
GFRA1	GRB7
HADH	HMGCS2
GH1	OVGP1
CCDC65	TCTE1
HOXA9	PPIE
KLK3	SPDEF
POLR2A	HOXA9
COL11A1	COL19A1
NUP98	HOXA9
GDNF	GFRA1
OMD	ST3GAL1
NCAM1	GFRA1
C11orf16	C1orf105
C11orf16	EFR3B
PRMT5	HOXA9
OMD	B3GNT4
OMD	B3GNT3
POU3F2	SOX11
SOX11	POU3F3
PLXDC1	ASPN
HMGCS2	AACS
STK11	SPDEF
HMGCS2	HADHB
COL11A1	COL12A1
MINOS1	C1orf194
HMGCS2	CARM1
HOXA9	MEIS2
ITGA11	COL11A1
DNMT3B	AJAP1
OMD	CHST6
SP1	HMGCS2
COL4A5	COL11A1
COL11A1	COL7A1
APOA2	IGDCC3
RHOXF2	IGDCC3
AHSG	IGDCC3
POU5F1	IGDCC3
HMGCS2	ACAA1
BSG	AJAP1
ASPN	MC2R
LTA	FAM183A
KY	IGFN1
HMGCS2	DLST
EDNRB	GFRA1
MEN1	HOXA9
AKAP1	AKAP14
COL11A1	PAQR6
OMD	CHST5
GRB2	GFRA1
MYB	HOXA9
HOXA9	KAT5
COL11A1	COL17A1
PTPN11	GFRA1
SPAG6	TEKT1
SMAD4	HOXA9
SMAD4	NKX3-2
COL11A1	COL9A3
ASPN	COL9A3
CS	HMGCS2
NKAIN4	FAM180A
UBC	HOXA9
HOXA9	HIST1H4L
EPHB4	HOXA9
FCGR2B	HOXA9
CDC73	HOXA9
JUN	HOXA9
HOXA9	PBX3
HOXA9	PIM1
HOXA9	PBX2
HOXA9	CUL4A
HOXA9	ASXL1
CYBB	HOXA9
HOXA9	MLLT3
PSIP1	HOXA9
HOXA9	SPP1
HOXA9	PBX1
HDAC9	HOXA9
GMPS	HOXA9
OMD	PRELP
PIGR	IL17A
GFRA1	DOK4
CTNNB1	AJAP1
CTNNB1	GFRA1
SDC3	COL11A1
ASPN	ECM2
OMD	ECM2
UBC	COL11A1
OMD	ST3GAL2
DPAGT1	DPT
SMOC2	ASPN
FN1	DPT
PLSCR4	C1orf194
FMOD	DPT
FMOD	ASPN
FMOD	OMD
PIGR	FCAR
RET	GFRA1
PDLIM7	GFRA1
COL11A1	COL27A1
COL11A1	COL13A1
PIGR	CALM1
TFRC	PIGR
PIGR	FCRL2
PIGR	FCGR3A
PIGR	FCRL1
PIGR	FCRL3
PIGR	FCGR1A
PIGR	RAB3B
PIGR	TLR4
PIGR	TPD52
PIGR	PIGA
PIGR	MIS12
PIGR	AP1M1
PIGR	TNF
INS-IGF2	HMGCS2
HMGCS2	FDPS
COL11A1	ELAVL4
COL11A1	COL9A1
SRC	GFRA1
COL11A1	ECHDC2
COL11A1	COL20A1
COL11A1	COL18A1
COL11A1	COL4A2
COL11A1	HORMAD1
COL6A1	COL11A1
COL11A1	THBS2
CACYBP	COL11A1
COL11A1	ITGA10
COL11A1	COL24A1
SCP2	COL11A1
COL11A1	ZYG11A
COL11A1	COL5A1
COL11A1	COL4A6
SDC4	COL11A1
COL11A1	COL9A2
COL11A1	COL16A1
COL11A1	COL5A2
ITGB1	COL11A1
COL11A1	COL15A1
ASPN	COL11A1
COL11A1	COL4A1
APBB1IP	COL11A1
COL11A1	ITGA8
POSTN	COL11A1
COL11A1	FBXL19
COL2A1	COL11A1
COL11A1	COL23A1
COL11A1	NMB
COL11A1	COL4A3
COL11A1	COL4A4
ITGA4	COL11A1
COL11A1	EMID2
COL28A1	COL11A1
COL11A1	ITGA6
COL11A1	SNORD84
COL11A1	DDR1
SFRP4	COL11A1
ABCF1	COL11A1
HMGCS2	MAX
HMGCS2	NCOA6
CD163	ASPN
ASPN	MFAP5
RUNX2	SPDEF
SIN3A	NKX3-2
GFRA1	SOX10
TLR1	OVGP1
FH	DPT
TCTE3	TCTE1
ASPN	THBS2
TCTE1	TCP10L2
HMGCS2	ACAT2
DYNLT1	TCTE1
IKBKE	OVGP1
TXN	PRG4
ATP1B1	NKAIN4
DPT	THEMIS
DPT	WDR78
TLR4	DPT
ASPN	DPT
HMGA2	DPT
TGFBI	DPT
LCE2B	C1orf194
HMGCS2	SCP2
HMGCS2	OXCT2
HMGCS2	HMGCL
HMGCS2	AUH
HMGCS2	ZBTB17
MYC	HMGCS2
HMGCS2	SUCLA2
HMGCS2	SUCLG1
HMGCS2	CHD9
HMGCS2	CTU2
NCOA2	HMGCS2
HMGCS2	TBL1XR1
RXRA	HMGCS2
LAIR1	OVGP1
OVGP1	SELV
MAGOH	C1orf194
VARS2	C1orf194
PSMB8	C1orf194
DDAH2	C1orf194
NKAIN4	LRRN4
GFRA1	SLC44A5
AKAP14	ACTRT1
RHOXF2	AJAP1
AKAP14	GJA9-MYCBP
AKAP14	EFHC2
TCTE1	TCP10
ASPN	COL9A2
RBBP4	NKX3-2
HDAC1	NKX3-2
AR	SPDEF
NKX3-1	SPDEF
ASPN	COL5A2
ASPN	OMD
ASPN	ITGBL1
ASPN	PLXDC2
ASPN	BMP2
POSTN	ASPN
CYP21A2	ASPN
ASPN	CTDSP2
ASPN	MATN3
ASPN	SFRP4
OMD	ST3GAL6
PPIA	AJAP1
RBBP7	NKX3-2
GFRA1	DOK6
GRB10	GFRA1
CTNND1	GFRA1
SOS1	GFRA1
CREB1	GFRA1
GFRA1	ARTN
GFRA1	SHC1
