# Supplementary material for: Landscape of Metabolite-Protein Interaction Networks Reveals Prognostic Subtypes of Ovarian Cancer
Source: Research Square preprint supplement (doi:10.21203/rs.3.rs-3235226/v1), 2023-08-10
Supplement: Supplementary file 4 [file 3a551d419c93b1d3baefd7f9.xlsx]

## Sheet: Table S1
Genes	log2FC	Pvalue	Padj
ABCA12	-3.6133	3.98952e-46	2.24397e-45
ABCG8	3.80976	1.02833e-41	4.99455e-41
ACTL8	3.54067	1.16087e-49	7.40399e-49
ADCY2	-3.09064	3.07856e-41	1.46647e-40
ADD2	3.78312	5.10982e-98	2.09708e-96
ADH1B	-3.01398	1.39693e-18	3.21057e-18
ADRA2C	3.20531	1.40019e-110	1.02559e-108
AGR2	-4.31598	2.8864e-44	1.52479e-43
AGT	-3.50327	1.86613e-86	4.61139e-85
AKNAD1	-4.78983	3.17895e-10	5.43432e-10
ALK	3.93348	3.48616e-96	1.31205e-94
ALPP	6.5073	8.30554e-81	1.63844e-79
AMHR2	3.08656	7.83465e-24	2.14465e-23
AMY1A	4.00447	5.91398e-38	2.52151e-37
ANKRD45	3.81033	1.90099e-116	1.84826e-114
APOA1	8.44578	5.76379e-138	1.77634e-135
ASPA	-3.12068	2.22792e-63	2.2617e-62
ASPN	-3.94218	5.28732e-112	4.25434e-110
ATP2B2	5.6041	4.4596e-81	8.88331e-80
ATP2B3	8.38197	1.44261e-96	5.54437e-95
ATP6V1B1	7.25164	9.32526e-161	1.38472e-157
AVPR1B	3.64004	4.74589e-69	5.92655e-68
BAGE2	-3.84603	1.76414e-72	2.53211e-71
BCAS1	-3.44029	3.33823e-42	1.64982e-41
BHLHE41	3.0624	3.48181e-104	1.78842e-102
BMP2	-3.57066	1.52711e-106	8.78305e-105
C13orf36	7.87271	7.70505e-154	8.9896e-151
C15orf55	3.17265	6.76198e-06	9.68691e-06
C17orf55	-4.83436	5.11983e-132	1.1301e-129
C1orf161	-4.31779	3.51808e-85	8.31612e-84
C1orf180	4.03507	5.72715e-39	2.53447e-38
C1orf186	5.32139	1.37755e-97	5.51494e-96
C2orf65	4.33098	1.94211e-110	1.41618e-108
C2orf88	3.78047	6.11e-116	5.73568e-114
C6orf208	-5.11228	2.26526e-89	6.31412e-88
C9orf171	3.42732	7.05669e-30	2.34324e-29
C9orf50	3.12776	2.50495e-83	5.54415e-82
CACNA1A	3.14114	2.08839e-139	7.10662e-137
CACNA1B	5.42453	4.2406e-98	1.74914e-96
CACNG4	3.24302	2.08494e-49	1.31488e-48
CALHM3	5.44302	5.11598e-137	1.54749e-134
CCDC135	3.6914	5.03061e-58	4.26635e-57
CCL25	3.21006	4.41757e-73	6.46564e-72
CCNA1	6.71216	2.18245e-127	3.71334e-125
CDH2	3.40441	6.40685e-51	4.24714e-50
CDH4	-3.10456	6.28907e-44	3.28407e-43
CDH6	4.59868	3.48588e-97	1.36871e-95
CDKN2A	3.88327	1.27501e-79	2.40209e-78
CHODL	5.14832	1.38167e-145	6.83886e-143
CHST4	4.24404	1.59327e-100	7.09112e-99
CLCA2	-3.20005	6.03499e-53	4.2766e-52
CLDN10	5.20313	1.57211e-70	2.08601e-69
CLDN18	-3.23425	4.79669e-70	6.25265e-69
CLDN2	-3.89222	4.7112e-74	7.17173e-73
CLDN6	8.85657	2.86379e-152	2.59873e-149
CLDN9	3.68943	4.36729e-92	1.36658e-90
CLGN	3.0373	2.83483e-60	2.6131e-59
CLIC5	3.84968	3.62079e-135	1.00241e-132
CNTNAP2	-3.08714	3.11256e-44	1.64161e-43
COL17A1	-6.22577	4.58757e-110	3.22989e-108
CP	4.47353	6.88305e-74	1.03525e-72
CPA3	-4.4339	1.15801e-93	3.89999e-92
CPLX2	4.79084	1.41071e-60	1.31147e-59
CRABP1	5.82616	3.87817e-94	1.32801e-92
CRABP2	4.07221	5.75054e-105	3.14145e-103
CRB2	6.37744	4.70127e-170	1.53581e-166
CRISP3	3.30634	6.80973e-16	1.43319e-15
CRYM	-3.79312	5.43911e-50	3.50049e-49
CSMD1	-3.24154	7.45688e-41	3.50304e-40
CTCFL	4.9265	4.5917e-128	8.24184e-126
CTSG	-4.32077	1.77232e-84	4.10625e-83
CXCL14	-3.37908	7.44525e-60	6.75615e-59
CYP17A1	4.34573	4.75979e-74	7.23896e-73
CYP4Z1	3.0703	1.4123e-42	7.07189e-42
D4S234E	5.04196	6.17769e-135	1.68177e-132
DAPL1	6.67797	1.83941e-106	1.04323e-104
DIO2	-3.9714	6.6936e-77	1.12948e-75
DMRTC1B	-3.16436	2.99636e-45	1.63196e-44
DNAJB13	6.35357	2.063e-117	2.11931e-115
DNASE1L3	-3.63837	1.63344e-92	5.21106e-91
DOK7	3.82444	1.69897e-133	4.08103e-131
DUSP9	3.0225	1.38898e-43	7.19101e-43
DYDC2	4.61555	9.66244e-134	2.4281e-131
ELF5	-3.47771	6.80801e-41	3.20652e-40
ELOVL3	3.29374	1.56806e-95	5.75568e-94
EMID2	3.29198	3.37058e-51	2.25266e-50
EMX2	8.89605	2.01782e-146	1.17711e-143
EMX2OS	7.4452	4.87003e-101	2.20964e-99
EPHX4	3.10623	1.90958e-102	9.20093e-101
ESR1	4.27095	1.28785e-67	1.52544e-66
EYA2	3.31781	1.14044e-83	2.55527e-82
EYA4	3.26907	2.15811e-52	1.50003e-51
FABP4	-3.29549	2.43306e-35	9.58092e-35
FAM166B	3.09107	3.19947e-83	7.05265e-82
FAM184B	-5.01953	3.61455e-45	1.96538e-44
FAM83A	3.54375	9.59867e-33	3.48643e-32
FAM90A1	3.31941	1.49257e-117	1.55284e-115
FAT2	3.30832	2.03712e-38	8.84014e-38
FER1L5	3.00862	2.10787e-77	3.65498e-76
FGF18	5.01844	7.31708e-150	5.1964e-147
FGF9	3.21456	3.0583e-69	3.86046e-68
FLJ14107	-3.75274	6.91813e-42	3.38708e-41
FLJ40292	-3.47185	1.44329e-59	1.29602e-58
FOLR1	5.73595	6.41903e-140	2.23082e-137
FOLR3	6.15167	3.7275e-126	6.02822e-124
FOXD1	-3.01458	5.34851e-44	2.80098e-43
FOXJ1	5.1933	7.04952e-110	4.89987e-108
FOXP2	-5.32367	6.25255e-105	3.3706e-103
FRMPD1	3.49983	7.67773e-105	4.0983e-103
FUT6	-3.59629	1.33406e-54	1.00835e-53
FXYD7	3.34186	1.49602e-82	3.16939e-81
GAL3ST2	4.71615	4.39209e-112	3.55151e-110
GDF1	3.80432	1.85435e-84	4.28415e-83
GDPD2	4.62729	6.42226e-68	7.68508e-67
GJB7	3.18529	7.30275e-43	3.69985e-42
GJC3	-3.52624	5.73493e-63	5.76103e-62
GLDC	4.12108	1.34016e-66	1.52545e-65
GLYATL1	-3.50381	5.44207e-33	1.9971e-32
GMPR	3.17789	4.45817e-119	4.95373e-117
GPR156	3.67461	8.78006e-115	8.10245e-113
GPR173	3.36575	8.15198e-152	6.65772e-149
GPR64	4.69374	3.62177e-116	3.41954e-114
GPX2	-5.22495	1.94458e-93	6.48219e-92
GRIK5	4.71138	1.93342e-84	4.45424e-83
GRIN2A	3.02859	1.35482e-53	9.86609e-53
HGD	-3.61943	4.10723e-43	2.09976e-42
HIF3A	3.4053	3.27573e-78	5.80323e-77
HIST1H3G	3.00274	1.62674e-67	1.91988e-66
HMGA2	3.58794	3.00641e-46	1.69802e-45
HOXA10	-3.89605	1.02978e-47	6.15457e-47
HOXA11	-3.26697	1.07229e-59	9.6767e-59
HP	4.88048	1.72065e-53	1.24801e-52
HTR3A	6.87779	3.56654e-131	7.66525e-129
ID4	3.08474	3.00068e-93	9.94181e-92
IGF2	3.95233	6.32384e-65	6.72485e-64
IGSF11	3.12111	5.64274e-74	8.53412e-73
IHH	-3.48491	1.21676e-41	5.88703e-41
IMPG2	4.03195	8.69298e-103	4.23854e-101
INA	3.51563	1.18061e-70	1.57807e-69
IQSEC3	4.30428	3.46971e-138	1.13349e-135
ITIH1	-4.36825	2.8253e-05	3.93254e-05
KBTBD12	3.40307	1.22428e-39	5.53352e-39
KCNH2	3.07899	2.67698e-77	4.60756e-76
KCNH3	3.24296	1.39962e-66	1.59091e-65
KCNK10	-3.11382	1.51785e-82	3.20731e-81
KCNK4	-3.57984	8.46458e-33	3.07998e-32
KCNK9	3.50956	2.98717e-63	3.02307e-62
KCNMB2	3.8282	3.95464e-120	4.64712e-118
KCNQ2	-3.03518	1.51235e-17	3.34862e-17
KCNS1	3.43213	4.26934e-81	8.52511e-80
KCNT1	6.4786	5.47416e-137	1.62573e-134
KIF1A	7.08639	7.98468e-88	2.08675e-86
KIF5A	3.73232	1.38557e-71	1.91958e-70
KIR2DL3	-4.24823	0.00430909	0.00534148
KIR3DL2	-4.35006	2.6263e-11	4.696e-11
KLHDC8A	3.75587	3.10321e-89	8.60576e-88
KLHL14	7.38584	9.44431e-173	3.85659e-169
KLK14	4.65497	1.18467e-96	4.57458e-95
KRT1	-4.97198	3.28496e-27	1.00031e-26
KRT23	3.09395	3.86625e-51	2.57866e-50
L1CAM	4.43497	1.53527e-108	1.01118e-106
LCN12	3.23292	1.44045e-76	2.41316e-75
LCNL1	3.3614	3.10072e-90	8.91674e-89
LGR5	4.36353	1.27726e-55	9.96791e-55
LGR6	4.56021	6.16722e-116	5.75631e-114
LGSN	3.07628	3.6954e-22	9.6177e-22
LIX1	6.38669	3.40943e-107	2.02508e-105
LOC100133545	3.23662	1.47659e-94	5.19797e-93
LOC100240735	3.08448	2.53961e-108	1.63315e-106
LOC441869	3.05089	4.10518e-113	3.54783e-111
LPAR3	6.26309	2.70091e-129	5.07088e-127
LPO	4.59489	1.78412e-133	4.22346e-131
LRFN2	-4.59545	1.51326e-53	1.09856e-52
LRRC26	-3.83788	9.47313e-47	5.46957e-46
LRRC31	-7.81445	5.2861e-46	2.95493e-45
LRRN2	4.02693	2.13815e-135	6.02148e-133
LRRN4	3.38316	1.19172e-57	1.00028e-56
LY6G6C	4.9122	9.67262e-85	2.26027e-83
LYG2	3.19136	9.42797e-76	1.52321e-74
LYPD1	6.25388	7.48987e-168	1.52924e-164
LYPD6B	3.97202	1.62418e-141	6.63234e-139
MAG	5.46667	8.72498e-98	3.53632e-96
MAGED4	3.689	1.89914e-91	5.80909e-90
MAL	4.4639	3.09008e-73	4.54306e-72
MAOA	-3.34834	3.1202e-106	1.75743e-104
MAPK15	3.03527	1.69252e-94	5.93252e-93
MAST1	3.18123	2.11833e-121	2.68223e-119
MEIS1	4.31749	4.21525e-175	2.29506e-171
MEOX1	3.03787	1.81883e-73	2.70326e-72
MPPED2	3.18097	1.42189e-74	2.20352e-73
MS4A2	-3.86328	1.47698e-92	4.73969e-91
MSLN	8.06953	8.41275e-154	9.16092e-151
MUC16	8.45254	2.76781e-150	2.05497e-147
MYCN	3.65052	9.68401e-105	5.10254e-103
MYH11	-3.79049	3.59307e-120	4.25285e-118
MYLPF	4.6048	4.36468e-142	1.82802e-139
NAT8L	3.94863	3.33844e-119	3.76069e-117
NCAM1	3.02633	1.67886e-60	1.55633e-59
NCRNA00093	-4.88166	1.66969e-91	5.12644e-90
NCRNA00176	3.89605	7.04604e-145	3.385e-142
NDST3	3.41651	1.67394e-94	5.88004e-93
NLRP2	3.56118	3.00611e-10	5.14479e-10
NLRP7	3.53026	5.62186e-83	1.22111e-81
NMU	3.64606	7.26501e-89	1.98108e-87
NOS2	-3.54781	2.83518e-124	4.13481e-122
NPAS3	4.36701	2.11672e-133	4.93922e-131
NPR1	4.66028	1.20301e-163	1.965e-160
NRADDP	3.31341	2.15995e-141	8.60505e-139
NXNL2	5.13574	1.41304e-111	1.09907e-109
OLFM4	-3.67294	1.21935e-41	5.89603e-41
OR2W3	3.54435	1.01954e-75	1.64557e-74
P2RY14	-3.65797	2.30402e-152	2.21376e-149
PART1	4.81856	9.38709e-81	1.84956e-79
PAX8	5.70198	4.05057e-83	8.90471e-82
PCDH19	4.11357	5.97636e-105	3.24312e-103
PGA3	3.08077	4.90595e-46	2.74713e-45
PIGR	-4.36179	9.50415e-57	7.75041e-56
PIP5K1P1	-5.54586	1.33227e-93	4.46844e-92
PKHD1L1	4.68276	2.33292e-84	5.35949e-83
PLA1A	-3.10316	1.09577e-82	2.34578e-81
PLEKHG4B	3.25003	3.36308e-89	9.31061e-88
PNMA3	4.09618	4.74047e-104	2.4273e-102
PNOC	6.78552	5.08795e-158	6.39281e-155
POM121L8P	-3.27635	5.56211e-58	4.71222e-57
PPARGC1A	-3.34764	1.45296e-69	1.86138e-68
PRAME	6.6108	8.55203e-104	4.33816e-102
PRKY	-11.0372	2.35164e-110	1.69963e-108
PRODH	-3.33472	2.72996e-70	3.60187e-69
PRSS1	7.74128	1.37363e-135	3.93628e-133
PRSS21	7.19163	9.1395e-123	1.23376e-120
PRSS50	4.57021	2.65347e-112	2.18898e-110
PTGS1	4.25408	3.88322e-168	9.06121e-165
PTH2R	5.25436	1.09827e-52	7.72576e-52
PTX3	4.08879	4.36956e-133	9.91284e-131
RAB27B	-3.22164	8.71735e-68	1.03858e-66
RASSF6	-3.20121	1.59848e-92	5.10949e-91
RBP1	3.55428	1.04347e-111	8.23382e-110
RD3	4.14701	2.09241e-104	1.085e-102
REC8	4.20591	1.2888e-123	1.81477e-121
RNF182	4.12064	4.33882e-107	2.56776e-105
RNF212	3.84582	1.00142e-48	6.16557e-48
RSPO1	5.95694	1.02526e-125	1.61025e-123
RSPO4	4.47694	5.6653e-71	7.68579e-70
S100A1	5.90054	2.54026e-104	1.31306e-102
S100A5	3.8421	1.21001e-87	3.15219e-86
S100P	-3.44942	6.21984e-34	2.34414e-33
SCN2B	3.3076	1.31455e-77	2.28667e-76
SCN5A	3.30538	7.01739e-101	3.16636e-99
SCNN1B	-4.05821	1.82167e-71	2.5131e-70
SCXB	3.80055	9.16602e-120	1.06941e-117
SERPINB2	3.67949	4.75617e-29	1.53897e-28
SFRP5	3.20887	1.1021e-41	5.34016e-41
SFTPA2	-3.5171	2.34948e-66	2.64847e-65
SHANK1	3.73187	2.87174e-110	2.05733e-108
SHH	-4.99043	9.07129e-49	5.58923e-48
SIAH3	5.43035	2.81559e-129	5.16739e-127
SLC12A1	3.10125	2.40755e-45	1.31346e-44
SLC13A5	4.80659	1.6871e-72	2.43008e-71
SLC22A3	-3.68815	3.12414e-81	6.27671e-80
SLC27A6	5.54822	1.7219e-98	7.17489e-97
SLC28A3	3.13569	5.28944e-46	2.95579e-45
SLC34A2	4.87146	4.96941e-58	4.21883e-57
SLC4A10	-3.30548	6.91344e-55	5.27683e-54
SLC6A13	3.5261	7.69837e-29	2.47044e-28
SLPI	3.62126	1.16249e-95	4.30568e-94
SMC1B	4.30386	1.20514e-97	4.86044e-96
SMOC1	-3.11924	1.49176e-59	1.33808e-58
SNCG	3.20151	2.15643e-85	5.13457e-84
SNX32	3.85205	6.99555e-123	9.52211e-121
SPOCK3	3.01489	1.13769e-36	4.66557e-36
SPON1	5.08319	5.29822e-148	3.32851e-145
ST6GALNAC5	3.53025	1.30207e-97	5.23844e-96
SULT1B1	-3.13092	1.46597e-31	5.12196e-31
SULT4A1	3.24197	1.54199e-53	1.11892e-52
SVOPL	3.8574	9.3969e-93	3.05755e-91
TCAM1P	4.52879	2.50969e-82	5.25554e-81
TCEAL2	3.04487	8.99615e-57	7.35083e-56
TCN1	-5.24557	8.90246e-71	1.19583e-69
TCP11	4.17211	1.43167e-100	6.40682e-99
TEKT2	4.25024	2.26955e-120	2.7059e-118
TEPP	3.45388	7.24726e-65	7.68681e-64
TFF3	-3.67501	2.10884e-53	1.52415e-52
TGM1	4.31078	6.24919e-98	2.54549e-96
THRSP	4.27587	7.1133e-42	3.47662e-41
TMEM132C	6.59179	1.31037e-121	1.67215e-119
TMOD1	3.18668	2.70012e-138	9.00077e-136
TMPRSS3	4.41708	2.96912e-130	5.93084e-128
TNNI3	5.36151	9.91436e-115	9.09782e-113
TNNT1	6.12158	1.13107e-118	1.23166e-116
TNS4	-4.3911	6.5743e-61	6.17863e-60
TPSB2	-3.7547	1.06359e-94	3.77667e-93
TPTE	-3.04755	1.26268e-30	4.28431e-30
TRIM17	3.49897	2.5344e-116	2.44952e-114
TRIM58	4.03181	9.93555e-80	1.87832e-78
TRPM5	3.25746	9.5182e-79	1.73323e-77
TSIX	3.07567	7.44713e-48	4.4639e-47
TTYH1	3.05162	1.45307e-57	1.21653e-56
UCA1	4.38048	5.2497e-69	6.53571e-68
UCHL1	3.27035	1.16321e-77	2.02556e-76
UNC5A	4.22898	1.87461e-82	3.94078e-81
UPK1B	7.62006	7.28417e-89	1.98299e-87
UPK3B	6.44095	1.14827e-152	1.17224e-149
UTS2	-3.02538	3.87138e-39	1.72209e-38
VWA3A	4.41617	5.94154e-82	1.22537e-80
VWCE	3.11689	5.58344e-74	8.45226e-73
WBSCR17	3.8698	8.30932e-74	1.24632e-72
WDR38	4.51552	1.31578e-87	3.41684e-86
WDR49	4.293	4.76017e-80	9.10452e-79
WFDC2	4.41144	1.16431e-127	2.02318e-125
WISP3	5.48022	3.89965e-88	1.03069e-86
WIT1	9.00772	1.62404e-189	2.65271e-185
WNT10A	4.21581	8.33113e-100	3.61917e-98
WNT6	3.84063	6.24433e-92	1.94276e-90
WNT7A	8.20833	4.07979e-131	8.65446e-129
WT1	9.50964	6.78457e-187	5.54096e-183
ZBED2	3.06188	3.94046e-45	2.13832e-44
ZFP92	3.8985	3.94062e-146	2.21952e-143
ZG16B	-3.50144	1.61823e-54	1.21583e-53
ZNF208	3.03198	1.18072e-46	6.77886e-46
ZNF385D	-3.5663	1.84502e-83	4.1058e-82
ZNF492	4.42151	1.3999e-142	6.01736e-140
ZNF676	3.47709	1.44003e-22	3.79806e-22
ZNF98	4.89784	2.38412e-125	3.70879e-123
