# Supplementary material for: Landscape of Metabolite-Protein Interaction Networks Reveals Prognostic Subtypes of Ovarian Cancer
Source: Research Square preprint supplement (doi:10.21203/rs.3.rs-3235226/v1), 2023-08-10
Supplement: Supplementary file 5 [file 42a30053557640f4f09884f5.xlsx]

## Sheet: Table S4
variate	HR	HR.confint.lower	HR.confint.upper	p.value
NUAK1	1.193	1.009	1.41	0.039
C1QTNF3	1.161	1.016	1.326	0.0278
COL16A1	1.269	1.092	1.475	0.0019
CCDC80	1.205	1.066	1.361	0.0028
TIMP3	1.185	1.044	1.345	0.0085
CRISPLD2	1.151	1.012	1.309	0.0328
GLT8D2	1.179	1.006	1.383	0.0421
LRRN4	1.146	1.007	1.304	0.0395
FLNC	1.161	1.018	1.322	0.0254
GFPT2	1.292	1.066	1.565	0.0088
CILP	1.18	1.045	1.333	0.0078
COL8A1	1.122	1.008	1.25	0.036
SFRP2	1.065	1.007	1.127	0.027
EDNRA	1.176	1.001	1.381	0.0484
MMP14	1.142	1	1.303	0.0499
FZD1	1.29	1.083	1.536	0.0044
COLEC12	1.206	1.027	1.416	0.0223
CILP2	1.169	1.018	1.342	0.0273
LMOD1	1.217	1.026	1.443	0.0239
ZCCHC24	1.303	1.094	1.552	0.003
FBN1	1.171	1.019	1.344	0.0257
CLMP	1.227	1.03	1.461	0.0218
MFAP4	1.103	1.015	1.199	0.0207
PODN	1.192	1.046	1.359	0.0083
SSC5D	1.233	1.057	1.437	0.0075
SLIT3	1.163	1.01	1.34	0.0359
ZNF469	1.236	1.049	1.456	0.0113
