# Supplementary material for: Landscape of Metabolite-Protein Interaction Networks Reveals Prognostic Subtypes of Ovarian Cancer
Source: Research Square preprint supplement (doi:10.21203/rs.3.rs-3235226/v1), 2023-08-10
Supplement: Supplementary file 6 [file 922c6895adb11940d4710c50.xlsx]

## Sheet: TCGA
Table S1. Clinicopathological characteristics of 328 patients with HGSOC in TCGA OV cohort
Patients number		328
Ages (years,median)		58 (30-87)
Tumor residual (%)
	>20 mm	62 (18.9)
	11-20 mm	24 (7.3)
	1-10 mm	144 (43.9)
	No Macroscopic disease	57 (17.4)
	Unknown	41 (12.5)
Lymphatic_invasion (%)
	No	46 (14)
	Yes	96 (29.3)
	Unknown	186 (56.7)
Venous_invasion (%)
	No	38 (11.6)
	Yes	62 (18.9)
	Unknown	228 (69.5)
Grade (%)
	1	1 (0.3)
	2	40 (12.2)
	3	266 (81.1)
	Unknown	21 (6.4)
Radiotherapy (%)
	No	304 (92.7)
	Yes	2 (0.6)
	Unknown	22 (6.7)

## Sheet: GSE51088
Clinicopathological characteristics of 142 OV patients in GSE51088
Patients number		142
Ages (years,median)		57.43 ( 26.44-85.58)
Tumor histology
	Clear Cell	3 (2.1)
	Endometrioid	7 (4.9)
	Mucinous	9 (6.3)
	Serous	123 (86.6)
Grade (%)
	0/1	16 (11.3)
	2	14 (9.9)
	3	110 (77.5)
	Unknown	2 (1.4)
FIGO stage (%)
	1	21 (14.8)
	2	6 (4.2)
	3	98 (69.0)
	4	17 (12.0)
Recurrence (%)
	No	127 (89.4)
	Yes	15 (10.6)
Patients Status (%)
	Alive	38 (26.8)
	Dead	104 (73.2)
OS survival (months, median)		49 (1-230)
*Although this dataset contains 174 samples (benign and malignant), we only used 142 OV specimens in this dataset.
、

## Sheet: GSE49997
Clinicopathological characteristics of 194 OV patients in GSE49997
Patients number		194
Ages (years,median)		57 ( 26-85)
Tumor histology
	Non-serous	23 (11.9)
	serous	171 (88.1)
Grade
	1&2	50 (25.8)
	3	143 (73.7)
	Unknown	1 (0.5)
FIGO stage
	2	9 (4.6)
	3	154 (79.4)
	4	31 (16.0)
Tumor residual
	No	137 (70.6)
	Yes	57 (29.4)
Patients Status
	Alive	137 (70.6)
	Dead	57 (29.4)
OS survival (months, median)		24.5 (1-49)

## Sheet: GSE14764
Clinicopathological characteristics of 80 OV patients in GSE14764
Patients number		80
Tumor histology
	Clear Cell	2 (2.5)
	Endometrioid	6 (7.5)
	Mucinous	70 (87.5)
	other	2 (2.5)
Grade
	1	2 (2.5)
	2	34 (42.5)
	3	54 (67.5)
FIGO stage
	1	8 (10)
	2	1 (1.2)
	3	69 (86.3)
	4	2 (2.5)
Tumor residual
	No	50 (62.5)
	Yes	26 (32.5)
	Unknown	4 (5)
Patients Status
	Alive	59 (73.8)
	Dead	21 (26.2)
OS survival（months, median）		35 (7-73)
